# Supplementary material for: Gastroenterological and hepatic manifestations of patients with COVID-19, prevalence, mortality by country, and intensive care admission rate: systematic review and meta-analysis
Source: PubMed Central journal article supplement — BMJ Open Gastroenterol. 2021 Mar 4;8(1):e000571. doi: 10.1136/bmjgast-2020-000571 (PMC7934201; doi:10.1136/bmjgast-2020-000571), 2021-03-04

## Supplemental Material

Table 1. Studies included in the meta-analysis

| Study              | Journal                                                 | Study type                 | Date   | Country   |
|--------------------|---------------------------------------------------------|----------------------------|--------|-----------|
| Siegel et al       | American Roentgen Ray Society                           | Case series                | Apr-20 | USA       |
| Pazgan-simon et al | Polish Archives of Internal Medicine                    | Case report                | Apr-20 | Poland    |
| Yang, X et al      | Clinics and Research in Hepatology and Gastroenterology | Case report                | Apr-20 | China     |
| Zhang, J et al     | Allergy (John Wiley and Sons Ltd.)                      | Retrospective cohort study | Feb-20 | China     |
| Azwar et al        | Indones J Intern Med                                    | Case report                | Jan-20 | Indonesia |
| Jin, X et al       | BMJ                                                     | Retrospective cohort study | Mar-20 | China     |
| Nobel et al        | Gastroenterology                                        | Case-Control Study         | Apr-20 | USA       |
| Lin et al          | BMJ                                                     | Retrospective cohort study | Mar-20 | China     |
| Zhou et al         | Gastroenterology                                        | Retrospective cohort study | Mar-20 | China     |
| Pan et al          | The American Journal of GASTROENTEROLOGY                | Cross-sectional study      | Apr-20 | China     |
| Poggiali et al     | European Journal of Case Reports in Internal Medicine   | Case series                | Mar-20 | Italy     |
| Cholankeril et al  | Gastroenterology                                        | Retrospective cohort study | Apr-20 | USA       |
| Fu et al           | Digestive Diseases and Sciences (Springer)              | Case report                | Apr-20 | China     |
| Li et al           | World Journal of Clinical Cases                         | Case report                | Apr-20 | China     |
| Saeed et al        | British Journal of Surgery                              | Retrospective cohort study | Apr-20 | Norway    |
| Arashiro et al.    | Journal of travel medicine                              | case-report                | Apr-20 | Japan     |
| Yang F et al       | Journal Of Medical Virology                             | Retrospective Cohort Study | Apr-20 | China     |
| Guillen, E et al   | American Journal of Transplantation                     | Case Report                | Mar-20 | Spain     |
| Chen, Y et al      | Journal Of Medical Virology                             | Retrospective Cohort Study | Apr-20 | China     |
| Chen Q et al       | Journal of Medical Virology                             | SHORT COMMUNICATION        | Mar-20 | China     |
| Huang et al        | The Lancet                                              | Prospective Cohort study   | Fab-20 | China     |
| Chen, N et al      | The Lancet                                              | Retrospective Cohort Study | Fab-20 | China     |
| Wang et al         | JAMA                                                    | Case series                | Mar-20 | China     |
| Xu, X et al        | BMJ                                                     | retrospective case series  | Fab-20 | China     |
| Fan et al          | MedRxiv                                                 | Retrospective Cohort Study | Fab-20 | China     |
| Zhang, B et al     | MedRxiv                                                 | Retrospective Cohort Study | Fab-20 | China     |

| Study               | Journal                                  | Study type                        | Date   | Country     |
|---------------------|------------------------------------------|-----------------------------------|--------|-------------|
| Huang Y et al       | MedRxiv                                  | Retrospective Cohort Study        | Mar-20 | China       |
| Wan, S et al        | Journal of Medical Virology              | Retrospective Cohort Study        | Mar-20 | China       |
| Zhang, Y et al      | Liver International                      | Retrospective Cohort Study        | Mar-20 | China       |
| Xu, Z et al         | The Lancet                               | Case Report                       | Fab-20 | China       |
| Arentz et al        | JAMA                                     | Retrospective Cohort Study        | Mar-20 | USA         |
| Hajifathalian et al | Gastroenterology                         | Retrospective Cohort Study        | May-20 | USA         |
| Kujawski et al      | MedRxiv                                  | Retrospective Cohort Study        | Mar-20 | USA         |
| Young et al         | JAMA                                     | Case series                       | Mar-20 | Singapore   |
| Sun et al           | Clinical Infectious Diseases             | retrospective case-control        | Mar-20 | Singapore   |
| Pung et al          | The Lancet                               | Retrospective Cohort Study        | Mar-20 | Singapore   |
| Tabata et al        | MedRxiv                                  | Retrospective Cohort Study        | Apr-20 | Japan       |
| Kluytmans et al     | MedRxiv                                  | cross-sectional study             | Mar-20 | Netherlands |
| Qian et al          | Quarterly Journal of Medicine            | Retrospective case series         | Mar-20 | China       |
| Luo et al           | Clinical Gastroenterology and Hepatology | Retrospective cohort study        | Mar-20 | China       |
| Zhou F et al        | Lancet                                   | Retrospective Cohort Study        | Mar-20 | China       |
| Chen T et al        | BMJ                                      | Retrospective Case Series         | Mar-20 | China       |
| Xu H et al          | MedRxiv                                  | Retrospective Cohort Study        | Mar-20 | China       |
| Shi S et al         | JAMACardio                               | Retrospective Cohort Study        | Mar-20 | China       |
| Han R et al         | Lancet                                   | Retrospective Cohort Study        | Jun-20 | China       |
| Xu S et al          | MedRxiv                                  | Retrospective analysis            | Mar-20 | China       |
| Ma L et al          | MedRxiv                                  | Retrospective Study               | Mar-20 | China       |
| Liu L et al         | Microbes and infection                   | Retrospective Study               | May-20 | China       |
| Mao L et al         | JAMANEurology                            | Case Series                       | Apr-20 | China       |
| Ai JW et al         | Frontiers in Medicine                    | Cross sectional study             | Jun-20 | China       |
| Liu Y et al         | MedRxiv                                  | Retrospective Study               | May-20 | China       |
| Shu L et al         | Lancet                                   | Retrospective Cohort Study        | Apr-20 | China       |
| Wei L et al         | MedRxiv                                  | Retrospective Cohort Study        | May-20 | China       |
| Zhao Z et al        | MedRxiv                                  | Retrospective Study               | Mar-20 | China       |
| Zhao W et al        | MedRxiv                                  | Retrospective Cohort Study        | Mar-20 | China       |
| Yang P et al        | MedRxiv                                  | Retrospective Study               | Mar-20 | China       |
| Li K et al          | Investigative Radiology                  | Retrospective Study               | Jun-20 | China       |
| Qi D et al          | MedRxiv                                  | Retrospective Descriptive study   | Mar-20 | China       |
| Wen Y et al         | MedRxiv                                  | Retrospective Study               | Mar-20 | China       |
| Xu Y et al          | MedRxiv                                  | Retrospective Observational Study | Mar-20 | China       |
| Yan S et al         | MedRxiv                                  | Retrospective Study               | Mar-20 | China       |
| Wang L et al        | European Respiratory Journal             | Retrospective Study               | Apr-20 | China       |
| Chen X et al        | MedRxiv                                  | Observational study               | Mar-20 | China       |
| Liu S et al         | BMC Infectious Diseases                  | Cohort Study                      | Jun-20 | China       |

| Study                                                       | Journal                                                 | Study type                 | Date   | Country                                                             |
|-------------------------------------------------------------|---------------------------------------------------------|----------------------------|--------|---------------------------------------------------------------------|
| Yao et al                                                   | Chinese Journal of Hepatology                           | Retrospective Study        | Mar-20 | China                                                               |
| Tian S et al                                                | MedRxiv                                                 | Retrospective study        | Mar-20 | China                                                               |
| Lu H et al                                                  | MedRxiv                                                 | Descriptive Study          | Feb-20 | China                                                               |
| Fu H et al                                                  | MedRxiv                                                 | Observational Study        | Mar-20 | China                                                               |
| Fu H et al                                                  | MedRxiv                                                 | Observational Study        | Mar-20 | China                                                               |
| Chen D et al                                                | MedRxiv                                                 | Retrospective Study        | Feb-20 | China                                                               |
| Kuang et al                                                 | Gastroenterology                                        | Retrospective study        | Feb-20 | China                                                               |
| Rubin et al                                                 | Journal of Clinical And Translational Science           | Cohort                     | May-20 | USA                                                                 |
| Covid-19 National Emergency Response Center South Korea     | Osong Public Health and Research Perspectives           | Case Series                | Feb-20 | South Korea                                                         |
| Pung et al                                                  | Lancet                                                  | Retrospective              | Mar-20 | Singapore                                                           |
| Wolfel et al                                                | Nature                                                  | Case series                | Apr-20 | Germany                                                             |
| Dreher et al                                                | Dtsch Arztebl International                             | Retrospective              | Apr-20 | Germany                                                             |
| Gritti et al                                                | MedRxiv                                                 | Observational Cohort Study | Apr-20 | Italy                                                               |
| Spiteri et al                                               | Euro Surveillance                                       | Surveillance               | Mar-20 | Germany, Finland, Italy, Russia, Spain, France, Sweden, and Belgium |
| Covid-19 National Incident Room Surveillance Team Australia | Communicable Diseases Intelligence (2018)               | Epidemiology Report        | Mar-20 | Australia                                                           |
| An P et. al.                                                | European Respiratory Journal                            | Case series                | Jan-20 | China                                                               |
| Chan et. al.                                                | MedRxiv                                                 | Case series                | Jan-20 | China                                                               |
| Chang et al                                                 | BMC Infectious Diseases                                 | Case series                | Jan-20 | China                                                               |
| Chen et al                                                  | Chinese Journal of Hepatology                           | Case series                | Jan-20 | China                                                               |
| Cheung et al                                                | MedRxiv                                                 | Case series                | Feb-20 | China                                                               |
| Fan H et al                                                 | MedRxiv                                                 | Case series                | Feb-20 | China                                                               |
| Fernandez-Ruiz et al                                        | MedRxiv                                                 | Case series                | Mar-20 | Spain                                                               |
| Guan et al                                                  | MedRxiv                                                 | Retrospective cohort       | Jan-20 | China                                                               |
| Han et al                                                   | MedRxiv                                                 | Retrospective cohort       | Feb-20 | China                                                               |
| Hsieh et al                                                 | Clinics and Research in Hepatology and Gastroenterology | Case series                | Feb-20 | Taiwan                                                              |
| Huang et al                                                 | Allergy (John Wiley and Sons Ltd.)                      | Case series                | Feb-20 | China                                                               |
| Huang et al                                                 | Indones J Intern Med                                    | Case series                | Feb-20 | China                                                               |
| Kim ES et al                                                | BMJ                                                     | Case series                | Feb-20 | Korea                                                               |
| Klopfenstein et al                                          | Gastroenterology                                        | Case series                | Mar-20 | France                                                              |
| Liu K et al                                                 | BMJ                                                     | Case series                | Jan-20 | China                                                               |
| Lechien et al                                               | Gastroenterology                                        | Case series                | Feb-20 | Europe                                                              |
| Liu Y et al                                                 | The American Journal of GASTROENTEROLOGY                | Case series                | Jan    | China                                                               |
| Pan F et al                                                 | European Journal of Case Reports in Internal Medicine   | Retrospective cohort       | Feb-20 | China                                                               |
| Redd et al                                                  | Gastroenterology                                        | Retrospective cohort       | Apr-20 | US                                                                  |

| Study              | Journal                                                 | Study type                      | Date    | Country        |
|--------------------|---------------------------------------------------------|---------------------------------|---------|----------------|
| Ren et al          | Digestive Diseases and Sciences (Springer)              | Case series                     | Dec-19  | China          |
| Shi H et al        | World Journal of Clinical Cases                         | Retrospective cohort            | Jan-20  | China          |
| Song et al         | British Journal of Surgery                              | Case series                     | Jan-20  | China          |
| Wan Y et al        | Journal of travel medicine                              | Case series                     | Mar-20  | China          |
| Wang L (b) et. al. | Journal Of Medical Virology                             | Case series                     | Feb-20  | China          |
| Wang L (c) et. al. | Journal Of Medical Virology                             | Case series                     | Feb-20  | China          |
| Wang X et. al.     | Journal of Medical Virology                             | Case series                     | Feb-20  | China          |
| Wang Z et. al.     | The Lancet                                              | Case series                     | Jan-20  | China          |
| Wei X-S et. al.    | The Lancet                                              | Case series                     | Feb-20  | China          |
| Wu J (a) et. al.   | JAMA                                                    | Retrospective cohort            | Feb-20  | China          |
| Wu J (b) et al     | BMJ                                                     | Case series                     | 20-Feb  | China          |
| Wu Y et. al.       | MedRxiv                                                 | Case series                     | Mar-20  | China          |
| Xia X et. al.      | MedRxiv                                                 | Case series                     | Mar-20  | China          |
| Xiao F et. al.     | MedRxiv                                                 | Case series                     | Feb-20  | China          |
| Xie H et. al.      | Journal of Medical Virology                             | Case series                     | Feb-20  | China          |
| Xiong Y et. al.    | Liver International                                     | Case series                     | Feb-20  | China          |
| Xu X et al         | The Lancet                                              | Case series                     | Feb-20  | China          |
| Yu P et. al.       | JAMA                                                    | Case series                     | Jan-20  | China          |
| Zhang J (b) et. al | Gastroenterology                                        | Case series                     | Feb-20  | China          |
| Zhao X-Y et. al.   | MedRxiv                                                 | Case series                     | Feb-20  | China          |
| Zhou S et. al.     | JAMA                                                    | Case series                     | Jan-20  | China          |
| Zou L et. al.      | Clinical Infectious Diseases                            | Case series                     | Jan-20  | China          |
| Sulaiman et al.    | JGH Open                                                | retrospective descriptive study | Aug-20  | Iraq           |
| Elmunzer et al     | Clinical Gastroenterology and Hepatology                | observational cohort study      | Sept-20 | USA and Canada |
| Laszkowska et al   | Clinical Gastroenterology and Hepatology                | retrospective study             | Sept-20 | USA            |
| Hundt et al        | Hepatology                                              | Retrospective cohort study      | July-20 | USA and Canada |
| Ferm et al         | Clinical Gastroenterology and Hepatology                | Retrospective cohort study      | Sept-20 | USA            |
| Zhan et al         | Journal of International Medical Research               | retrospective study             | July-20 | China          |
| Ramachandran et al | Digestive Diseases                                      | Retrospective cohort study      | June-20 | USA            |
| Suleyman et al     | JAMA                                                    | Case series                     | June-20 | USA            |
| Khader et al       | Radiology Case Reports                                  | Case report                     | Nov-20  | Qatar          |
| Grande G et al     | ACG Case Reports                                        | Case Report                     | Sept-20 | Italy          |
| Gulen M            | Clinics and Research in Hepatology and Gastroenterology | Case Report                     | Sep-20  | Turkey         |
| Cholankeril et al  | The American Journal of GASTROENTEROLOGY                | Retrospective study             | Sept-20 | USA            |
| Cavaliere et al    | Gastrointestinal endoscopy                              | Case series                     | Aug-20  | China?         |
| Hassani AH et al   | Gastroenterology and Hepatology from Bed to Bench       | Case reports                    | Sep-20  | Iran           |

| Study                | Journal                                                  | Study type                 | Date     | Country  |
|----------------------|----------------------------------------------------------|----------------------------|----------|----------|
| Wu CY et al          | Journal of International Medical Research                | Case report                | Sept-20  | China    |
| Wang K et al         | Open Forum Infectious Disease                            | Case report                | Sept-20  | China    |
| Dietrich CG et al    | European Journal of Gastroenterology and Hepatology      | Case report                | Nov-20   | Germany  |
| Kandasamy S et al    | Annals of Hepato-Biliary-Pancreatic Surgery              | Case Report                | Nov-20   | India    |
| Wagner J et al       | SN comprehensive clinical medicine                       | Retrospective cohort study | Sep-20   | USA      |
| Wahab SF et al       | BMJ Case Reports                                         | Case Report                | Aug-20   | Denmark  |
| Cheung S et al       | American journal of Case Reports                         | Case Report                | Aug-20   | USA      |
| Docherty AB. et al.  | Diseases                                                 | Retrospective cohort study | April-20 | UK       |
| Fanelli V. et al.    | Critical Care                                            | Retrospective cohort study | April-20 | Spain    |
| CDC USA              | Morb. Mortal. Wkly Rep                                   | Retrospective cohort study | April-20 | USA      |
| CDC USA              | Morb. Mortal. Wkly Rep                                   | Retrospective cohort study | April-20 | USA      |
| Borobia A. et al.    | Journal of Clinical Medicine                             | Retrospective cohort study | June-20  | Spain    |
| Gil-Rodrigo A. et al | Emergencias                                              | Retrospective cohort study | Aug-20   | Spain    |
| Livanos AE. et al.   | MedRxiv                                                  | Retrospective cohort study | Nov-20   | USA      |
| Bannaga AS. et al    | Clinical Medicine Journal                                | Retrospective cohort study | Sept-20  | UK       |
| Moura DTH et al      | Clinics                                                  | Retrospective cohort study | July-20  | Brazil   |
| A. Papa et al        | European Review for Medical and Pharmacological Sciences | case control               | July-20  | Italy    |
| N Aumpan et al.      | JGH Open                                                 | Retrospective cohort study | July-20  | Thailand |
| Ping Lei et al       | Hepatology international                                 | Retrospective cohort study | Sept-20  | China    |
| Mo P, et al.         | Clinical Infectious Disease                              | Retrospective cohort study | Sept-20  | China    |
| Tsibouris et al      | Annals of Gastroenterology                               | Retrospective cohort study | June-20  | Greece   |
| Aghemo et al         | Clinical Gastroenterology and Hepatology                 | Retrospective cohort study | Sept-20  | Italy    |
| Klopfenstein et al   | Clinical Gastroenterology and Hepatology                 | Retrospective cohort study | June-20  | France   |
| Colaneri et al       | Euro Surveillance                                        | Retrospective cohort study | Apr-20   | Italy    |

**Table. 2** The Methodical Index for Non-randomized Studies (MINORS)

| Study          | Clearly stated aim | Inclusion of consecutive patients | Prospective data collection | Endpoints appropriate to study aim | Endpoints appropriate to study aim | Follow-up period appropriate to study aim | Adequate control group | Adequate statistical analyses | Total |
|----------------|--------------------|-----------------------------------|-----------------------------|------------------------------------|------------------------------------|-------------------------------------------|------------------------|-------------------------------|-------|
| Siegel et al   | 1                  | 1                                 | 0                           | 0                                  | 0                                  | 0                                         | 0                      | 0                             | 2     |
| Pazgan-simonal | 1                  | 0                                 | 0                           | 1                                  | 0                                  | 0                                         | 0                      | 0                             | 2     |
| Yang, X et al  | 1                  | 0                                 | 0                           | 1                                  | 0                                  | 0                                         | 0                      | 0                             | 2     |
| Zhang, J et al | 2                  | 2                                 | 2                           | 1                                  | 0                                  | 0                                         | 0                      | 1                             | 8     |
| Azwar et al    | 1                  | 1                                 | 0                           | 1                                  | 0                                  | 1                                         | 0                      | 0                             | 4     |
| Jin, X et al   | 2                  | 2                                 | 2                           | 2                                  | 0                                  | 1                                         | 1                      | 1                             | 11    |

|                     |   |   |   |   |   |   |   |   |   |
|---------------------|---|---|---|---|---|---|---|---|---|
| Nobel et al         | 2 | 2 | 2 | 1 | 0 | 0 | 0 | 1 | 8 |
| Lin et al           | 1 | 1 | 0 | 2 | 0 | 1 | 0 | 1 | 6 |
| Zhou et al          | 2 | 2 | 0 | 2 | 0 | 0 | 0 | 1 | 7 |
| Pan et al           | 2 | 2 | 1 | 0 | 0 | 0 | 0 | 1 | 6 |
| Poggiali et al      | 2 | 0 | 0 | 1 | 0 | 1 | 0 | 2 | 6 |
| Cholankeril et al   | 2 | 1 | 2 | 0 | 2 | 0 | 0 | 1 | 8 |
| Fu et al            | 2 | 0 | 1 | 1 | 0 | 0 | 0 | 0 | 4 |
| Li et al            | 2 | 0 | 2 | 0 | 0 | 0 | 0 | 0 | 4 |
| Saeed et al         | 2 | 1 | 2 | 1 | 0 | 0 | 0 | 1 | 7 |
| Arashiro et al.     | 2 | 0 | 0 | 2 | 0 | 0 | 0 | 1 | 5 |
| Yang F et al        | 2 | 1 | 2 | 0 | 2 | 0 | 0 | 1 | 8 |
| Guillen, E et al    | 2 | 1 | 1 | 1 | 0 | 1 | 0 | 2 | 8 |
| Chen, Y et al       | 1 | 1 | 0 | 2 | 0 | 1 | 0 | 1 | 6 |
| Chen Q et al        | 2 | 1 | 0 | 1 | 0 | 0 | 0 | 1 | 5 |
| Huang et al         | 2 | 2 | 1 | 0 | 0 | 0 | 0 | 1 | 6 |
| Chen, N et al       | 2 | 0 | 1 | 1 | 0 | 0 | 0 | 2 | 6 |
| Wang et al          | 2 | 0 | 2 | 0 | 0 | 0 | 0 | 2 | 6 |
| Xu, X et al         | 2 | 1 | 0 | 1 | 0 | 0 | 0 | 2 | 6 |
| Fan et al           | 2 | 0 | 1 | 1 | 0 | 0 | 0 | 2 | 6 |
| Zhang, B et al      | 2 | 1 | 2 | 0 | 0 | 0 | 0 | 2 | 7 |
| Huang Y et al       | 2 | 0 | 1 | 1 | 0 | 0 | 0 | 2 | 6 |
| Wan, S et al        | 2 | 0 | 2 | 0 | 0 | 0 | 0 | 2 | 6 |
| Zhang, Y et al      | 2 | 1 | 0 | 1 | 0 | 0 | 0 | 2 | 6 |
| Xu, Z et al         | 2 | 0 | 0 | 0 | 0 | 0 | 0 | 2 | 4 |
| Arentz et al        | 1 | 2 | 2 | 2 | 0 | 0 | 0 | 1 | 8 |
| Hajifathalian et al | 2 | 1 | 1 | 1 | 0 | 0 | 0 | 2 | 7 |
| Kujawski et al      | 2 | 1 | 1 | 1 | 0 | 0 | 0 | 1 | 6 |
| Young et al         | 2 | 1 | 0 | 1 | 0 | 0 | 0 | 2 | 6 |
| Sun et al           | 2 | 0 | 0 | 0 | 0 | 0 | 0 | 2 | 4 |
| Pung et al          | 2 | 1 | 2 | 1 | 0 | 0 | 0 | 1 | 7 |
| Tabata et al        | 2 | 2 | 0 | 1 | 0 | 0 | 0 | 1 | 6 |
| Kluytmans et al     | 2 | 1 | 1 | 0 | 0 | 0 | 0 | 1 | 5 |
| Qian et al          | 2 | 0 | 0 | 1 | 0 | 1 | 0 | 2 | 6 |
| Luo et al           | 0 | 1 | 1 | 1 | 2 | 3 | 0 | 1 | 9 |
| Zhou F et al        | 1 | 0 | 1 | 2 | 0 | 2 | 0 | 2 | 6 |
| Chen T              | 1 | 1 | 1 | 2 | 1 | 0 | 0 | 2 | 8 |
| Xu H et al          | 2 | 1 | 0 | 3 | 0 | 0 | 0 | 1 | 7 |
| Shi S et al         | 2 | 1 | 1 | 0 | 0 | 0 | 0 | 2 | 6 |
| Han R et al         | 1 | 0 | 0 | 0 | 0 | 1 | 0 | 2 | 4 |
| Xu S et al          | 0 | 1 | 1 | 1 | 2 | 3 | 0 | 1 | 9 |

| Study                                       | Clearly stated aim | Inclusion of consecutive patients | Prospective data collection | Endpoints appropriate to study aim | Endpoints appropriate to study aim | Follow-up period appropriate to study aim | Adequate control group | Adequate statistical analyses | Total |
|---------------------------------------------|--------------------|-----------------------------------|-----------------------------|------------------------------------|------------------------------------|-------------------------------------------|------------------------|-------------------------------|-------|
| Ma L et al                                  | 2                  | 0                                 | 1                           | 3                                  | 0                                  | 3                                         | 0                      | 1                             | 9     |
| Liu L et al                                 | 2                  | 0                                 | 2                           | 0                                  | 0                                  | 0                                         | 0                      | 2                             | 6     |
| Mao L et al                                 | 2                  | 1                                 | 0                           | 1                                  | 0                                  | 0                                         | 0                      | 2                             | 6     |
| Ai JW et al                                 | c                  | 0                                 | 0                           | 0                                  | 0                                  | 0                                         | 0                      | 2                             | 4     |
| Shu L et al                                 | 1                  | 0                                 | 2                           | 0                                  | 0                                  | 0                                         | 0                      | 1                             | 4     |
| Wei L et al                                 | 2                  | 1                                 | 1                           | 1                                  | 0                                  | 0                                         | 0                      | 2                             | 7     |
| Zhao Z et al                                | 1                  | 1                                 | 0                           | 1                                  | 0                                  | 0                                         | 0                      | 1                             | 4     |
| Zhao W et al                                | 2                  | 0                                 | 2                           | 0                                  | 0                                  | 0                                         | 0                      | 2                             | 6     |
| Yang P et al                                | 2                  | 1                                 | 0                           | 1                                  | 0                                  | 0                                         | 0                      | 2                             | 6     |
| Li K et al                                  | 2                  | 0                                 | 0                           | 0                                  | 0                                  | 0                                         | 0                      | 2                             | 4     |
| Qi D et al                                  | 2                  | 1                                 | 0                           | 1                                  | 0                                  | 0                                         | 0                      | 1                             | 5     |
| Wen Y et al                                 | 2                  | 1                                 | 1                           | 0                                  | 0                                  | 0                                         | 0                      | 1                             | 5     |
| Xu Y et al                                  | 1                  | 0                                 | 0                           | 0                                  | 0                                  | 1                                         | 0                      | 2                             | 4     |
| Yan S et al                                 | 0                  | 1                                 | 1                           | 1                                  | 2                                  | 3                                         | 0                      | 1                             | 9     |
| Wang L et al                                | 2                  | 0                                 | 1                           | 3                                  | 0                                  | 4                                         | 0                      | 2                             | 11    |
| Chen X et al                                | 2                  | 1                                 | 0                           | 3                                  | 0                                  | 0                                         | 0                      | 1                             | 7     |
| Liu S et al                                 | 2                  | 1                                 | 1                           | 0                                  | 0                                  | 0                                         | 0                      | 2                             | 6     |
| Fan L et al                                 | 1                  | 0                                 | 1                           | 0                                  | 0                                  | 1                                         | 0                      | 2                             | 5     |
| Yao et al                                   | 0                  | 1                                 | 1                           | 1                                  | 2                                  | 3                                         | 0                      | 1                             | 9     |
| Tian S et al                                | 2                  | 0                                 | 1                           | 3                                  | 0                                  | 4                                         | 0                      | 1                             | 10    |
| Lu H et al                                  | 2                  | 1                                 | 0                           | 1                                  | 0                                  | 0                                         | 0                      | 2                             | 6     |
| Fu H et al                                  | 2                  | 1                                 | 1                           | 0                                  | 0                                  | 0                                         | 0                      | 1                             | 5     |
| Fu H et al                                  | 2                  | 1                                 | 0                           | 3                                  | 0                                  | 0                                         | 0                      | 1                             | 7     |
| Chen D et al                                | 2                  | 1                                 | 1                           | 0                                  | 0                                  | 0                                         | 0                      | 2                             | 6     |
| Kuang et al                                 | 1                  | 0                                 | 0                           | 0                                  | 0                                  | 1                                         | 0                      | 2                             | 4     |
| Rubin et al                                 | 0                  | 1                                 | 1                           | 1                                  | 2                                  | 3                                         | 0                      | 1                             | 9     |
| COVID-19 National Emergency Response Center | 2                  | 0                                 | 1                           | 3                                  | 0                                  | 4                                         | 0                      | 2                             | 12    |
| Pung et al                                  | 2                  | 2                                 | 0                           | 1                                  | 0                                  | 0                                         | 0                      | 1                             | 6     |
| Wolfel                                      | 2                  | 1                                 | 0                           | 1                                  | 0                                  | 0                                         | 0                      | 1                             | 5     |
| Dreher et al                                | 2                  | 1                                 | 1                           | 0                                  | 0                                  | 0                                         | 0                      | 1                             | 5     |
| Gritti et al                                | 2                  | 0                                 | 0                           | 1                                  | 0                                  | 1                                         | 0                      | 2                             | 6     |
| Spiteri et al                               | 0                  | 1                                 | 1                           | 1                                  | 2                                  | 3                                         | 0                      | 1                             | 9     |

| Study                                   | Clearly stated aim | Inclusion of consecutive patients | Prospective data collection | Endpoints appropriate to study aim | Endpoints appropriate to study aim | Follow-up period appropriate to study aim | Adequate control group | Adequate statistical analyses | Total |
|-----------------------------------------|--------------------|-----------------------------------|-----------------------------|------------------------------------|------------------------------------|-------------------------------------------|------------------------|-------------------------------|-------|
| Covid-19 National Incident Surveillance | 2                  | 0                                 | 1                           | 4                                  | 0                                  | 4                                         | 0                      | 2                             | 13    |
| An P et. al.                            | 1                  | 1                                 | 1                           | 2                                  | 1                                  | 0                                         | 0                      | 2                             | 8     |
| Chan F-W et.al.                         | 2                  | 1                                 | 0                           | 3                                  | 0                                  | 0                                         | 0                      | 1                             | 7     |
| Chang D et. al.                         | 2                  | 1                                 | 1                           | 0                                  | 0                                  | 0                                         | 0                      | 2                             | 6     |
| Chen Q (b) et. al.                      | 1                  | 0                                 | 0                           | 0                                  | 0                                  | 1                                         | 0                      | 2                             | 4     |
| Cheung K et. al.                        | 0                  | 1                                 | 1                           | 1                                  | 2                                  | 3                                         | 0                      | 1                             | 9     |
| Fan H et. al.                           | 2                  | 0                                 | 1                           | 3                                  | 0                                  | 3                                         | 0                      | 1                             | 9     |
| FernandezRuiz et. al.                   | 2                  | 0                                 | 2                           | 0                                  | 0                                  | 0                                         | 0                      | 2                             | 6     |
| Guan W-j et. al.                        | 2                  | 1                                 | 0                           | 1                                  | 0                                  | 0                                         | 0                      | 2                             | 6     |
| Han C et. al.                           | 1                  | 0                                 | 0                           | 0                                  | 0                                  | 0                                         | 0                      | 2                             | 4     |
| Hsieh W-H et. al.                       | 1                  | 0                                 | 2                           | 0                                  | 0                                  | 0                                         | 0                      | 1                             | 4     |
| Huang R et. al.                         | 2                  | 1                                 | 1                           | 1                                  | 0                                  | 0                                         | 0                      | 2                             | 7     |
| Huang WH et. al.                        | 1                  | 1                                 | 0                           | 1                                  | 0                                  | 0                                         | 0                      | 1                             | 4     |
| Kim ES et. al.                          | 2                  | 0                                 | 2                           | 0                                  | 0                                  | 0                                         | 0                      | 2                             | 6     |
| Klopfenstein T et. al.                  | 2                  | 1                                 | 0                           | 1                                  | 0                                  | 0                                         | 0                      | 2                             | 6     |
| Liu K et. al.                           | 2                  | 0                                 | 0                           | 0                                  | 0                                  | 0                                         | 0                      | 2                             | 4     |
| Lechien J et. al.                       | 2                  | 1                                 | 0                           | 1                                  | 0                                  | 0                                         | 0                      | 1                             | 5     |
| Liu Y et. al.                           | 2                  | 1                                 | 1                           | 0                                  | 0                                  | 0                                         | 0                      | 1                             | 5     |
| Pan F et. al.                           | 1                  | 0                                 | 0                           | 0                                  | 0                                  | 1                                         | 0                      | 2                             | 4     |
| Redd W et. al.                          | 0                  | 1                                 | 1                           | 1                                  | 2                                  | 3                                         | 0                      | 1                             | 9     |
| Ren L et. al.                           | 2                  | 0                                 | 1                           | 3                                  | 0                                  | 4                                         | 0                      | 2                             | 11    |
| Shi H et. al.                           | 2                  | 1                                 | 0                           | 3                                  | 0                                  | 0                                         | 0                      | 1                             | 7     |
| Song F et. al.                          | 2                  | 1                                 | 1                           | 0                                  | 0                                  | 0                                         | 0                      | 2                             | 6     |
| Wan Y et. al.                           | 1                  | 0                                 | 1                           | 0                                  | 0                                  | 1                                         | 0                      | 2                             | 5     |
| Wang L (b) et.                          | 0                  | 1                                 | 1                           | 1                                  | 2                                  | 3                                         | 0                      | 1                             | 9     |
| Wang L (c) et. al.                      | 2                  | 0                                 | 1                           | 3                                  | 0                                  | 4                                         | 0                      | 1                             | 10    |
| Wang X et. al.                          | 2                  | 1                                 | 0                           | 1                                  | 0                                  | 0                                         | 0                      | 2                             | 6     |
| Wang Z et. al.                          | 2                  | 1                                 | 1                           | 0                                  | 0                                  | 0                                         | 0                      | 1                             | 5     |
| Wei X-S et. al.                         | 2                  | 1                                 | 0                           | 3                                  | 0                                  | 0                                         | 0                      | 1                             | 7     |
| Wu J (a) et. al.                        | 2                  | 1                                 | 1                           | 0                                  | 0                                  | 0                                         | 0                      | 2                             | 6     |
| Wu J (b) et al                          | 1                  | 0                                 | 0                           | 0                                  | 0                                  | 1                                         | 0                      | 2                             | 4     |
| Wu Y et. al.                            | 0                  | 1                                 | 1                           | 1                                  | 2                                  | 3                                         | 0                      | 1                             | 9     |
| Xia X et. al.                           | 2                  | 0                                 | 1                           | 3                                  | 0                                  | 4                                         | 0                      | 2                             | 12    |
| Xiao F et. al.                          | 2                  | 2                                 | 0                           | 1                                  | 0                                  | 0                                         | 0                      | 1                             | 6     |



|                     |   |   |   |   |   |   |   |   |    |
|---------------------|---|---|---|---|---|---|---|---|----|
| Xie H et. al.       | 1 | 0 | 0 | 0 | 0 | 1 | 0 | 2 | 4  |
| Xiong Y et. al.     | 2 | 1 | 0 | 3 | 0 | 0 | 0 | 1 | 7  |
| Xu X et al          | 2 | 1 | 1 | 0 | 0 | 0 | 0 | 2 | 6  |
| Yu P et. al.        | 1 | 0 | 0 | 0 | 0 | 1 | 0 | 2 | 4  |
| Zhang J (b) et. al. | 0 | 1 | 1 | 1 | 2 | 3 | 0 | 1 | 9  |
| Zhao X-Y et. al.    | 2 | 0 | 1 | 3 | 0 | 4 | 0 | 1 | 10 |
| Zhou S et. al.      | 2 | 1 | 0 | 1 | 0 | 0 | 0 | 1 | 5  |
| Zou L et. al.       | 2 | 1 | 1 | 0 | 0 | 0 | 0 | 1 | 5  |
| Sulaiman et al.     | 1 | 0 | 0 | 0 | 0 | 1 | 0 | 2 | 4  |
| Elmunzer et al      | 0 | 1 | 1 | 1 | 2 | 3 | 0 | 1 | 9  |
| Laszkowska et al    | 2 | 0 | 1 | 3 | 0 | 4 | 0 | 2 | 11 |
| Hundt et al         | 2 | 1 | 0 | 3 | 0 | 0 | 0 | 1 | 7  |
| Ferm et al          | 2 | 1 | 1 | 0 | 0 | 0 | 0 | 2 | 6  |
| Zhan et al          | 1 | 0 | 1 | 0 | 0 | 1 | 0 | 2 | 5  |
| Ramachandran et al  | 0 | 1 | 1 | 1 | 2 | 3 | 0 | 1 | 9  |
| Suleyman et al      | 2 | 0 | 1 | 3 | 0 | 4 | 0 | 1 | 10 |
| Docherty AB. et al. | 2 | 1 | 0 | 1 | 0 | 0 | 0 | 2 | 6  |
| Fanelli V. et al.   | 2 | 1 | 2 | 0 | 0 | 0 | 0 | 1 | 6  |
| CDC USA             | 2 | 1 | 0 | 3 | 0 | 0 | 0 | 1 | 7  |
| CDC USA             | 2 | 1 | 1 | 0 | 0 | 0 | 0 | 2 | 6  |
| Borobia A. et al.   | 2 | 2 | 1 | 0 | 0 | 1 | 0 | 2 | 8  |
| Gil-Rodrigo et al   | 0 | 1 | 1 | 1 | 2 | 3 | 0 | 1 | 9  |
| Khader et al        | 2 | 0 | 1 | 3 | 0 | 4 | 0 | 2 | 12 |
| Grande G et al      | 2 | 2 | 0 | 1 | 0 | 0 | 0 | 1 | 6  |
| Gulen et al         | 2 | 2 | 0 | 1 | 0 | 1 | 0 | 2 | 8  |
| Cholanketil et al   | 2 | 1 | 0 | 3 | 0 | 0 | 0 | 1 | 7  |
| Cavaliere K et al   | 2 | 1 | 1 | 0 | 0 | 0 | 0 | 2 | 6  |
| Hassani AH et al    | 1 | 1 | 1 | 0 | 0 | 1 | 0 | 2 | 6  |
| Wu CY et al         | 2 | 1 | 0 | 3 | 0 | 0 | 0 | 1 | 7  |
| Wang K et al        | 2 | 1 | 1 | 0 | 0 | 0 | 0 | 2 | 6  |
| Dietrich al         | 1 | 0 | 1 | 0 | 0 | 1 | 0 | 2 | 5  |
| Kandasamy et al     | 0 | 1 | 1 | 1 | 2 | 3 | 0 | 1 | 9  |
| Wagner J et al      | 2 | 0 | 1 | 3 | 0 | 4 | 0 | 1 | 10 |
| Wahab SF            | 2 | 1 | 0 | 1 | 0 | 0 | 0 | 2 | 6  |
| Cheung S et al      | 2 | 1 | 1 | 0 | 0 | 0 | 0 | 1 | 5  |
| Livanos et al       | 2 | 1 | 0 | 3 | 0 | 0 | 0 | 1 | 7  |
| Bannaga et al       | 2 | 1 | 1 | 0 | 0 | 0 | 0 | 2 | 6  |
| Moura et al         | 1 | 2 | 0 | 0 | 0 | 1 | 0 | 2 | 6  |
| A. Papa et al       | 2 | 1 | 0 | 3 | 0 | 0 | 0 | 1 | 7  |
| N Aumpan et al.     | 2 | 0 | 1 | 3 | 0 | 4 | 0 | 1 | 10 |
| Ping Lei et al      | 2 | 1 | 0 | 1 | 0 | 0 | 0 | 2 | 6  |

|                    |   |   |   |   |   |   |   |   |   |
|--------------------|---|---|---|---|---|---|---|---|---|
| Mo P, et al.       | 2 | 2 | 2 | 0 | 0 | 0 | 0 | 1 | 7 |
| Tsibouris et al    | 2 | 1 | 0 | 3 | 0 | 0 | 0 | 1 | 7 |
| Klopfenstein et al | 2 | 1 | 1 | 0 | 0 | 0 | 0 | 2 | 6 |
| Aghemo et al       | 1 | 2 | 2 | 0 | 0 | 1 | 0 | 2 | 8 |
| Colaneri et al     | 0 | 1 | 1 | 1 | 2 | 3 | 0 | 1 | 9 |

**Table 3** Gastrointestinal symptoms reported by each study

| Study              | Total number of patients in each study (n) | Abdominal pain (n) | Diarrhea (n) | Nausea (n) | Vomiting (n) | Anorexia or loss of appetite (n) | Loss of taste (n) | Elevated liver enzymes (n) |
|--------------------|--------------------------------------------|--------------------|--------------|------------|--------------|----------------------------------|-------------------|----------------------------|
| Siegel et al       | 3                                          | 3                  | 3            | 2          | 2            | 0                                | 0                 | 0                          |
| Pazgan-simon et al | 1                                          | 1                  | 0            | 1          | 0            | 1                                | 0                 | 0                          |
| Yang, X et al      | 1                                          | 1                  | 0            | 0          | 0            | 0                                | 0                 | 0                          |
| Zhang, J et al     | 140                                        | 8                  | 18           | 24         | 7            | 17                               | 0                 | 8                          |
| Azwar et al        | 1                                          | 1                  | 0            | 0          | 1            | 0                                | 0                 | 0                          |
| Jin, X et al       | 651                                        | 0                  | 56           | 13         | 14           | 0                                | 0                 | 64                         |
| Nobel et al        | 278                                        | 0                  | 56           | 63         | 63           | 0                                | 0                 | 0                          |
| Lin et al          | 95                                         | 2                  | 23           | 17         | 4            | 17                               | 0                 | 31                         |
| Zhou et al         | 254                                        | 3                  | 46           | 21         | 15           | 0                                | 0                 | 0                          |
| Pan et al          | 204                                        | 2                  | 35           | 0          | 4            | 81                               | 0                 | 0                          |
| Poggiali et al     | 10                                         | 1                  | 6            |            | 3            | 0                                | 0                 | 0                          |
| Cholankeril et al  | 116                                        | 10                 | 12           | 1          | 1            | 22                               | 0                 | 26                         |
| Fu et al           | 1                                          | 0                  | 0            | 0          | 1            | 0                                | 0                 | 0                          |
| Li et al           | 1                                          | 0                  | 1            | 0          | 0            | 1                                | 0                 | 0                          |
| Saeed et al        | 9                                          | 9                  | 1            | 8          | 5            | 0                                | 0                 | 0                          |
| Arashiro et al.    | 1                                          | 0                  | 1            | 1          | 0            | 1                                | 0                 | 0                          |
| Yang F et al       | 92                                         | 0                  | 0            | 0          | 0            | 0                                | 0                 | 15                         |
| Guillen, E et al   | 1                                          | 0                  | 0            | 0          | 1            | 0                                | 0                 | 0                          |
| Chen, Y et al      | 42                                         | 5                  | 7            | 4          | 3            | 0                                | 0                 | 0                          |
| Chen Q et al       | 9                                          | 0                  | 2            | 0          | 0            | 0                                | 0                 | 0                          |
| Huang C et al      | 41                                         | 0                  | 1            | 0          | 0            | 0                                | 0                 | 0                          |
| Chen, N et al      | 99                                         | 0                  | 2            | 1          | 1            | 0                                | 0                 | 63                         |
| Wang et al         | 138                                        | 3                  | 14           | 14         | 5            | 55                               | 0                 |                            |
| Xu, X et al        | 62                                         | 0                  | 3            | 0          | 0            | 0                                | 0                 | 0                          |
| Fan et al          | 148                                        | 0                  | 6            | 6          | 0            | 0                                | 0                 | 75                         |
| Zhang, B et al     | 82                                         | 0                  | 10           | 0          | 2            | 0                                | 0                 | 0                          |
| Huang Y et al      | 36                                         | 0                  | 3            | 0          | 0            | 0                                | 0                 | 22                         |
| Wan, S et al       | 135                                        | 0                  | 18           | 4          | 0            | 6                                | 0                 | 0                          |

| Study               | Total number of patients in each study (n) | Abdominal pain (n) | Diarrhea (n) | Nausea (n) | Vomiting (n) | Anorexia or loss of appetite (n) | Loss of taste (n) | Elevated liver enzymes (n) |
|---------------------|--------------------------------------------|--------------------|--------------|------------|--------------|----------------------------------|-------------------|----------------------------|
| Zhang, Y et al      | 115                                        | 0                  | 0            | 0          | 0            | 0                                | 0                 | 28                         |
| Xu, Z et al         | 1                                          | 0                  | 0            | 0          | 0            | 0                                | 0                 | 1                          |
| Arentz et al        | 21                                         | 0                  | 0            | 0          | 0            | 0                                | 0                 | 8                          |
| Hajifathalian et al | 1059                                       | 72                 | 234          | 168        | 91           | 240                              | 57                | 656                        |
| Kujawski et al      | 12                                         | 1                  | 1            | 0          | 0            | 0                                | 0                 | 0                          |
| Young et al         | 18                                         | 0                  | 3            | 0          | 0            | 0                                | 0                 | 0                          |
| Sun et al           | 54                                         | 0                  | 0            | 0          | 0            | 0                                | 0                 | 0                          |
| Pung et al          | 36                                         | 0                  | 4            | 1          | 0            | 0                                | 0                 | 0                          |
| Tabata et al        | 104                                        | 0                  | 18           | 0          | 0            | 0                                | 0                 | 9                          |
| Kluytmans et al     | 86                                         | 5                  | 16           | 0          | 0            | 15                               | 6                 | 0                          |
| Qian et al          | 91                                         | 0                  | 21           | 11         | 6            | 23                               | 0                 | 0                          |
| Luo et al           | 183                                        | 45                 | 68           | 134        | 119          | -                                | -                 | 183                        |
| Zhou F et al        | 191                                        | -                  | 9            | 7          | 7            | -                                | -                 | 59                         |
| Chen T              | 274                                        | 19                 | 77           | 24         | 16           | -                                | -                 | 84                         |
| Xu H et al          | 1324                                       | -                  | 28           | -          | -            | 55                               | -                 | -                          |
| Shi S et al         | 416                                        | -                  | 29           | -          | -            | -                                | -                 | 416                        |
| Han R et al         | 108                                        | -                  | 15           | -          | -            | -                                | -                 | -                          |
| Xu S et al          | 355                                        | -                  | 130          | -          | -            | -                                | -                 | 102                        |
| Ma L et al          | 81                                         | -                  | 6            | -          | -            | -                                | -                 | 31                         |
| Liu L et al         | 153                                        | 1                  | 14           | 2          | 3            | -                                | -                 | -                          |
| Mao L et al         | 214                                        | 10                 | 41           | -          | -            | -                                | -                 | 26                         |
| Ai JW et al         | 102                                        | 4                  | 15           | 9          | 2            | -                                | -                 | 26                         |
| Shu L et al         | 545                                        | -                  | 49           | 0          | 0            | -                                | -                 | 41                         |
| Wei L et al         | 100                                        | -                  | 2            | -          | 2            | -                                | -                 | 17                         |
| Zhao Z et al        | 75                                         | 1                  | 7            | -          | -            | -                                | -                 | 15                         |
| Zhao W et al        | 77                                         | -                  | 1            | 6          | -            | -                                | -                 | 26                         |
| Yang P et al        | 55                                         | -                  | 2            | -          | -            | -                                | -                 | -                          |
| Li K et al          | 83                                         | -                  | 7            | -          | -            | -                                | -                 | -                          |
| Qi D et al          | 267                                        | -                  | 10           | 6          | -            | 46                               | -                 | 20                         |
| Wen Y et al         | 417                                        | -                  | 29           | -          | -            | -                                | -                 | -                          |
| Xu Y et al          | 45                                         | -                  | 0            | -          | -            | -                                | -                 | 17                         |
| Yan S et al         | 168                                        | 7                  | 12           | 9          | 7            | -                                | -                 | 18                         |
| Wang L et al        | 18                                         | -                  | 3            | -          | -            | -                                | -                 | 4                          |
| Chen X et al        | 291                                        | 1                  | 25           | 17         | -            | -                                | -                 | 44                         |
| Liu S et al         | 620                                        | -                  | 53           | -          | -            | -                                | -                 | 420                        |
| Fan L et al         | 55                                         | -                  | 6            | -          | 4            | -                                | -                 | -                          |
| Yao et al           | 40                                         | -                  | 3            | 3          | -            | -                                | -                 | 21                         |

| Study                                                       | Total number of patients in each study (n) | Abdominal pain (n) | Diarrhea (n) | Nausea (n) | Vomiting (n) | Anorexia or loss of appetite (n) | Loss of taste (n) | Elevated liver enzymes (n) |
|-------------------------------------------------------------|--------------------------------------------|--------------------|--------------|------------|--------------|----------------------------------|-------------------|----------------------------|
| Tian S et al                                                | 37                                         | -                  | 8            | -          | -            | -                                | -                 | 4                          |
| Lu H et al                                                  | 265                                        | -                  | 17           | 6          | -            | -                                | -                 | -                          |
| Fu H et al                                                  | 52                                         | -                  | 7            | 1          | -            | -                                | -                 | -                          |
| Fu H et al                                                  | 36                                         | -                  | 3            | -          | -            | -                                | -                 | 4                          |
| Chen D et al                                                | 175                                        | -                  | 35           | -          | -            | -                                | -                 | -                          |
| Kuang et al                                                 | 944                                        | -                  | 21           | -          | -            | -                                | -                 | -                          |
| Rubin et al                                                 | 54                                         | -                  | -            | -          | -            | -                                | -                 | -                          |
| COVID-19 National Emergency Response Center                 | 28                                         | 1                  | 2            | -          | -            | -                                | -                 | -                          |
| Pung et al                                                  | 17                                         | -                  | 4            | 1          | -            | -                                | -                 | -                          |
| Wolfel                                                      | 9                                          | -                  | 2            | -          | -            | -                                | -                 | -                          |
| Dreher et al                                                | 50                                         | -                  | 8            | 1          | 2            | -                                | -                 | -                          |
| Gritti et al                                                | 21                                         | -                  | 5            | -          | -            | -                                | -                 | -                          |
| Spiteri et al                                               | 38                                         | -                  | 1            | 1          | -            | -                                | -                 | -                          |
| Covid-19 National Incident Room Surveillance Team Australia | 295                                        | 6                  | 48           | 34         | -            | -                                | -                 | -                          |
| An P et. al.                                                | 9                                          | -                  | 1            | 1          | 1            | 6                                | -                 | -                          |
| Chan F-W et.al.                                             | 6                                          | -                  | 2            | -          | -            | -                                | -                 | -                          |
| Chang D et. al.                                             | 13                                         | -                  | 1            | -          | -            | -                                | -                 | -                          |
| Chen Q (b) et. al.                                          | 145                                        | -                  | 39           | 24         | 6            | -                                | -                 | -                          |
| Cheung K et. al.                                            | 59                                         | 7                  | 13           | -          | 1            | -                                | -                 | -                          |
| Fan H et. al.                                               | 101                                        | -                  | 2            | 7          | -            | -                                | -                 | -                          |
| FernandezRuiz et. al.                                       | 17                                         | 1                  | 3            | -          | -            | -                                | -                 | -                          |
| Guan W-j et. al.                                            | 1099                                       | -                  | 42           | 55         | 55           | -                                | -                 | -                          |
| Han C et. al.                                               | 206                                        | 9                  | 67           | -          | 24           | 32                               | -                 | -                          |
| Hsieh W-H et. al.                                           | 2                                          | 1                  | 1            | -          | -            | -                                | -                 | -                          |
| Huang R et. al.                                             | 11                                         | -                  | 1            | -          | -            | -                                | -                 | -                          |
| Huang WH et. al.                                            | 2                                          | -                  | -            | -          | -            | 2                                | -                 | -                          |
| Kim ES et. al.                                              | 28                                         | 1                  | 3            | -          | -            | -                                | -                 | -                          |
| Klopfenstein T et. al.                                      | 114                                        | 19                 | 55           | 25         | 9            | -                                | -                 | -                          |

| Study               | Total number of patients in each study (n) | Abdominal pain (n) | Diarrhea (n) | Nausea (n) | Vomiting (n) | Anorexia or loss of appetite (n) | Loss of taste (n) | Elevated liver enzymes (n) |
|---------------------|--------------------------------------------|--------------------|--------------|------------|--------------|----------------------------------|-------------------|----------------------------|
| Liu K et. al.       | 137                                        | -                  | 11           | -          | -            | -                                | -                 | -                          |
| Lechien J et. al.   | 417                                        | 125                | 208          | 91         | 91           | -                                | -                 | -                          |
| Liu Y et. al.       | 12                                         | -                  | 2            | 2          | -            | -                                | -                 | -                          |
| Pan F et. al.       | 21                                         | -                  | -            | -          | -            | 9                                | -                 | -                          |
| Redd W et. al.      | 318                                        | 46                 | 107          | 84         | 49           | 110                              | -                 | -                          |
| Ren L et. al.       | 5                                          | -                  | 0            | -          | -            | -                                | -                 | -                          |
| Shi H et. al.       | 81                                         | -                  | 3            | -          | 4            | -                                | -                 | -                          |
| Song F et. al.      | 51                                         | -                  | 5            | 3          | -            | 9                                | -                 | -                          |
| Wan Y et. al.       | 230                                        | -                  | 49           | -          | -            | -                                | -                 | -                          |
| Wang L (b) et.      | 26                                         | -                  | 0            | -          | -            | -                                | -                 | -                          |
| Wang L (c) et. al.  | 339                                        | -                  | 43           | 13         | -            | 94                               | -                 | -                          |
| Wang X et. al.      | 1021                                       | 37                 | 152          | -          | 36           | -                                | -                 | -                          |
| Wang Z et. al.      | 4                                          | -                  | 0            | -          | -            | -                                | -                 | -                          |
| Wei X-S et. al.     | 84                                         | 2                  | 26           | 16         | 6            | -                                | -                 | -                          |
| Wu J (a) et. al.    | 80                                         | -                  | 1            | 1          | 1            | -                                | -                 | -                          |
| Wu J (b) et al      | 80                                         | -                  | 7            | -          | -            | -                                | -                 | -                          |
| Wu Y et. al.        | 74                                         | -                  | 26           | -          | -            | -                                | -                 | -                          |
| Xia X et. al.       | 10                                         | -                  | 1            | 1          | -            | -                                | -                 | -                          |
| Xiao F et. al.      | 73                                         | -                  | 26           | -          | -            | -                                | -                 | -                          |
| Xie H et. al.       | 79                                         | -                  | 7            | -          | -            | -                                | -                 | -                          |
| Xiong Y et. al.     | 42                                         | -                  | 10           | -          | -            | -                                | -                 | -                          |
| Xu X et al          | 90                                         | -                  | 5            | 5          | 2            | -                                | -                 | -                          |
| Yu P et. al.        | 4                                          | -                  | -            | -          | -            | 4                                | -                 | -                          |
| Zhang J (b) et. al. | 14                                         | -                  | 0            | -          | 0            | -                                | -                 | -                          |
| Zhao X-Y et. al.    | 91                                         | 2                  | 13           | 10         | -            | 10                               | -                 | -                          |
| Zhou S et. al.      | 62                                         | 9                  | 9            | -          | -            | -                                | -                 | -                          |
| Zou L et. al.       | 18                                         | -                  | 1            | 1          | -            | 1                                | -                 | -                          |
| Sulaiman et al.     | 140                                        | 42                 | 41           | -          | 32           | 40                               | -                 | -                          |
| Elmunzer et al      | 1052                                       | -                  | 357          | 284        | 168          | 115                              | -                 | 554                        |
| Laszkowska et al    | 1084                                       | 334                | 657          | 649        | -            | -                                | -                 | -                          |
| Hundt et al         | 1827                                       | -                  | -            | -          | -            | -                                | -                 | 1158                       |
| Ferm et al          | 892                                        | 70                 | 177          | 148        | 91           | 70                               | 21                | -                          |
| Zhan et al          | 405                                        | 41                 | 112          | -          | 76           | 170                              | -                 | -                          |
| Ramachandran et al  | 150                                        | 3                  | 15           | 6          | 6            | -                                | -                 | -                          |
| Suleyman et al      | 463                                        | -                  | 100          | 94         | 53           | 11                               | -                 | -                          |
| Docherty AB. et al. | 16,749                                     | 1146               | 2292         | 2178       | -            | -                                | -                 | -                          |

| Study              | Total number of patients in each study (n) | Abdominal pain (n) | Diarrhea (n) | Nausea (n)  | Vomiting (n) | Anorexia or loss of appetite (n) | Loss of taste (n) | Elevated liver enzymes (n) |
|--------------------|--------------------------------------------|--------------------|--------------|-------------|--------------|----------------------------------|-------------------|----------------------------|
| Fanelli V. et al.  | 14,688                                     | -                  | 881          | -           | -            | 6                                | -                 | -                          |
| CDC USA            | 10,994                                     | 1329               | 3353         | 1746        | -            | -                                | -                 | -                          |
| CDC USA            | 6760                                       | -                  | 1507         | 923         | -            | -                                | -                 | -                          |
| Borobia A. et al.  | 2226                                       | -                  | 484          | 299         | -            | -                                | -                 | -                          |
| Gil-Rodrigo et al  | 1000                                       | 66                 | 186          | 75          | -            | -                                | -                 | -                          |
| Khader et al       | 1                                          | 1                  | -            | 1           | -            | -                                | -                 | -                          |
| Grande G et al     | 1                                          | -                  | -            | -           | 1            | -                                | -                 | -                          |
| Gulen et al        | 1                                          | 1                  | 1            | -           | -            | -                                | -                 | -                          |
| Cholankeril et al  | 207                                        | -                  | 22           | 22          | 22           | -                                | -                 | -                          |
| Cavaliere K et al  | 6                                          | -                  | -            | -           | 2            | -                                | -                 | -                          |
| Hassani AH et al   | 2                                          | 2                  | -            | -           | -            | -                                | -                 | -                          |
| Wu CY et al        | 1                                          | 1                  | -            | 1           | -            | -                                | -                 | -                          |
| Wang K et al       | 2                                          | 2                  | -            | -           | -            | -                                | -                 | -                          |
| Dietrich al        | 1                                          | 1                  | -            | 1           | -            | -                                | -                 | -                          |
| Kandasamy et al    | 1                                          | 1                  | -            | 1           | 1            | -                                | -                 | -                          |
| Wagner J et al     | 99                                         |                    |              |             |              |                                  |                   |                            |
| Wahab SF           | 1                                          | 1                  | 1            | -           | -            | -                                | -                 | -                          |
| Cheung S et al     | 1                                          | 1                  | -            | 1           | 1            | -                                | -                 | -                          |
| Livanos et al      | 634                                        | -                  | 245          | 157         | -            | -                                | -                 | -                          |
| Bannaga et al      | 321                                        | 15                 | 13           | 15          | -            | -                                | -                 | -                          |
| Moura et al        | 400                                        | 24                 | 69           | 55          | 30           | 46                               | -                 | -                          |
| A. Papa et al      | 34                                         | 1                  | 1            | 1           | -            | -                                | -                 | -                          |
| N Aumpan et al.    | 40                                         | 2                  | 6            | 2           | 2            | 7                                | -                 | -                          |
| Ping Lei et al     | 115                                        | -                  | 14           | 9           | 9            | 9                                | -                 | -                          |
| Mo P, et al.       | 155                                        | -                  | 7            | 3           | 3            | -                                | -                 | 55                         |
| Tsibouris et al    | 61                                         | 2                  | 11           | 2           | 2            | -                                | -                 | -                          |
| Klopfenstein et al | 114                                        | 19                 | 55           | 25          | 9            | -                                | -                 | -                          |
| Aghemo et al       | 325                                        | -                  | 69           | -           | 11           | -                                | -                 | 54                         |
| Colaneri et al     | 44                                         | -                  | 3            | -           | -            | -                                | -                 | -                          |
| <b>Total</b>       | <b>78798</b>                               | <b>3586</b>        | <b>13044</b> | <b>7645</b> | <b>1195</b>  | <b>1331</b>                      | <b>84</b>         | <b>4405</b>                |

**Table 4** Newcastle-Ottawa Scale scores to assess the quality of the studies (for cohort and case control studies)

| Study              | Selection                                        |                                 |                                                | Comparability                                                                      | Outcome                                       |                                                |                                                   | Total score (maximum: 8 stars) |
|--------------------|--------------------------------------------------|---------------------------------|------------------------------------------------|------------------------------------------------------------------------------------|-----------------------------------------------|------------------------------------------------|---------------------------------------------------|--------------------------------|
|                    | Representativeness of sample (maximum: one star) | Sample size (maximum: one star) | Assessment of the exposure (maximum: one star) | Comparability of cohorts on the basis of the design or analysis (maximum: 2 stars) | Assessment of the outcome (maximum: one star) | Was follow up long enough? (maximum: one star) | Adequacy of follow up cohorts (maximum: one star) |                                |
| Siegel et al       |                                                  |                                 | *                                              |                                                                                    |                                               |                                                |                                                   | * (1)                          |
| Pazgan-simon et al |                                                  |                                 | *                                              |                                                                                    |                                               |                                                |                                                   | * (1)                          |
| Yang, X et al      |                                                  |                                 |                                                |                                                                                    |                                               |                                                |                                                   | * (1)                          |
| Zhang, J et al     | *                                                |                                 | *                                              | *                                                                                  | *                                             |                                                | *                                                 | ***** (5)                      |
| Azwar et al        |                                                  |                                 | *                                              |                                                                                    |                                               |                                                |                                                   | * (1)                          |
| Jin, X et al       | *                                                |                                 | *                                              | *                                                                                  |                                               | *                                              |                                                   | **** (4)                       |
| Nobel et al        |                                                  |                                 | *                                              |                                                                                    | *                                             |                                                |                                                   | ** (2)                         |
| Lin et al          | *                                                | *                               | *                                              | *                                                                                  | *                                             | *                                              | *                                                 | ***** (7)                      |
| Zhou et al         | *                                                |                                 |                                                | *                                                                                  | *                                             |                                                | *                                                 | **** (4)                       |
| Pan et al          | *                                                | *                               | *                                              | **                                                                                 | *                                             | *                                              |                                                   | ***** (7)                      |
| Poggiali et al     | *                                                |                                 | *                                              |                                                                                    | *                                             |                                                |                                                   | *** (3)                        |
| Cholankeri et al   | *                                                | *                               | *                                              | *                                                                                  | *                                             |                                                | *                                                 | ***** (6)                      |
| Fu et al           |                                                  |                                 | *                                              |                                                                                    |                                               |                                                |                                                   | * (1)                          |
| Li et al           |                                                  |                                 | *                                              |                                                                                    |                                               |                                                |                                                   | * (1)                          |
| Saeed et al        | *                                                |                                 |                                                | *                                                                                  |                                               | *                                              | *                                                 | **** (4)                       |
| Arashiro et al.    |                                                  |                                 |                                                |                                                                                    |                                               |                                                |                                                   |                                |
| Yang F et al       | *                                                |                                 | *                                              | *                                                                                  | *                                             |                                                | *                                                 | ***** (5)                      |
| Guillen, E et al   |                                                  |                                 | *                                              |                                                                                    |                                               |                                                |                                                   | * (1)                          |
| Chen, Y et al      | *                                                | *                               | *                                              | *                                                                                  | *                                             |                                                | *                                                 | ***** (6)                      |
| Chen Q et al       |                                                  |                                 | *                                              |                                                                                    |                                               |                                                |                                                   | * (1)                          |
| Huang C et al      | *                                                |                                 | *                                              | *                                                                                  | *                                             |                                                | *                                                 | ***** (5)                      |
| Chen, N et al      | *                                                | *                               |                                                | *                                                                                  |                                               |                                                | *                                                 | **** (4)                       |

| Study               | Selection                                        |                                 |                                                | Comparability                                                                      | Outcome                                       |                                                |                                                   | Total score (maximum: 8 stars) |
|---------------------|--------------------------------------------------|---------------------------------|------------------------------------------------|------------------------------------------------------------------------------------|-----------------------------------------------|------------------------------------------------|---------------------------------------------------|--------------------------------|
|                     | Representativeness of sample (maximum: one star) | Sample size (maximum: one star) | Assessment of the exposure (maximum: one star) | Comparability of cohorts on the basis of the design or analysis (maximum: 2 stars) | Assessment of the outcome (maximum: one star) | Was follow up long enough? (maximum: one star) | Adequacy of follow up cohorts (maximum: one star) |                                |
| Wang et al          |                                                  |                                 | *                                              |                                                                                    | *                                             |                                                |                                                   | ** (2)                         |
| Xu, X et al         | *                                                | *                               | *                                              | *                                                                                  | *                                             |                                                | *                                                 | ***** (6)                      |
| Fan et al           | *                                                |                                 |                                                | *                                                                                  | *                                             |                                                | *                                                 | **** (4)                       |
| Zhang, B et al      | *                                                |                                 | *                                              | *                                                                                  | *                                             |                                                | *                                                 | ***** (5)                      |
| Huang Y et al       | *                                                |                                 |                                                | *                                                                                  | *                                             |                                                | *                                                 | ***** (4)                      |
| Wan, S et al        | *                                                | *                               |                                                | *                                                                                  |                                               | *                                              | *                                                 | ***** (5)                      |
| Zhang, Y et al      | *                                                | *                               |                                                | *                                                                                  | *                                             | *                                              | *                                                 | ***** (6)                      |
| Xu, Z et al         |                                                  |                                 | *                                              |                                                                                    |                                               |                                                |                                                   | * (1)                          |
| Arentz et al        | *                                                |                                 |                                                | *                                                                                  |                                               | *                                              | *                                                 | **** (4)                       |
| Hajifathalian et al | *                                                | *                               |                                                | *                                                                                  | *                                             |                                                | *                                                 | ***** (5)                      |
| Kujawski et al      | *                                                | *                               |                                                | *                                                                                  |                                               |                                                | *                                                 | **** (4)                       |
| Young et al         |                                                  |                                 | *                                              |                                                                                    |                                               |                                                |                                                   | * (1)                          |
| Sun et al           |                                                  |                                 | *                                              |                                                                                    | *                                             |                                                |                                                   | ** (2)                         |
| Pung et al          | *                                                | *                               | *                                              | *                                                                                  | *                                             |                                                | *                                                 | ***** (6)                      |
| Tabata et al        | *                                                |                                 |                                                | *                                                                                  | *                                             |                                                | *                                                 | **** (4)                       |
| Kluytmans et al     |                                                  |                                 | *                                              |                                                                                    |                                               |                                                |                                                   | * (1)                          |
| Qian et al          |                                                  |                                 | *                                              |                                                                                    | *                                             |                                                |                                                   | ** (2)                         |
| Luo et al           |                                                  |                                 | *                                              |                                                                                    |                                               |                                                |                                                   | * (1)                          |
| Zhou F et al        |                                                  |                                 | *                                              |                                                                                    | *                                             |                                                |                                                   | ** (2)                         |
| Chen T              |                                                  |                                 | *                                              |                                                                                    | *                                             |                                                |                                                   | ** (2)                         |



| Study        | Selection                                        |                                 |                                                | Comparability                                                                      | Outcome                                       |                                                |                                                   | Total score (maximum: 8 stars) |
|--------------|--------------------------------------------------|---------------------------------|------------------------------------------------|------------------------------------------------------------------------------------|-----------------------------------------------|------------------------------------------------|---------------------------------------------------|--------------------------------|
|              | Representativeness of sample (maximum: one star) | Sample size (maximum: one star) | Assessment of the exposure (maximum: one star) | Comparability of cohorts on the basis of the design or analysis (maximum: 2 stars) | Assessment of the outcome (maximum: one star) | Was follow up long enough? (maximum: one star) | Adequacy of follow up cohorts (maximum: one star) |                                |
| Xu H et al   |                                                  |                                 | *                                              |                                                                                    |                                               |                                                |                                                   | * (1)                          |
| Shi S et al  |                                                  |                                 | *                                              |                                                                                    |                                               |                                                |                                                   | * (1)                          |
| Han R et al  |                                                  |                                 | *                                              |                                                                                    | *                                             |                                                |                                                   | ** (2)                         |
| Xu S et al   |                                                  |                                 | *                                              |                                                                                    | *                                             |                                                |                                                   | ** (2)                         |
| Ma L et al   |                                                  |                                 | *                                              |                                                                                    |                                               |                                                |                                                   | * (1)                          |
| Liu L et al  |                                                  |                                 | *                                              |                                                                                    | *                                             |                                                |                                                   | ** (2)                         |
| Mao L et al  |                                                  |                                 | *                                              |                                                                                    | *                                             |                                                |                                                   | ** (2)                         |
| Ai JW et al  |                                                  |                                 | *                                              |                                                                                    |                                               |                                                |                                                   | * (1)                          |
| Shu L et al  |                                                  |                                 | *                                              |                                                                                    |                                               |                                                |                                                   | * (1)                          |
| Wei L et al  |                                                  |                                 | *                                              |                                                                                    | *                                             |                                                |                                                   | ** (2)                         |
| Zhao Z et al |                                                  |                                 | *                                              |                                                                                    |                                               |                                                |                                                   | * (1)                          |
| Zhao W et al |                                                  |                                 | *                                              |                                                                                    | *                                             |                                                |                                                   | ** (2)                         |
| Yang P et al |                                                  |                                 | *                                              |                                                                                    | *                                             |                                                |                                                   | ** (2)                         |
| Li K et al   |                                                  |                                 | *                                              |                                                                                    | *                                             |                                                |                                                   | ** (2)                         |
| Qi D et al   |                                                  |                                 | *                                              |                                                                                    | *                                             |                                                |                                                   | ** (2)                         |
| Wen Y et al  |                                                  |                                 | *                                              |                                                                                    | *                                             |                                                |                                                   | ** (2)                         |
| Xu Y et al   |                                                  |                                 | *                                              |                                                                                    | *                                             |                                                |                                                   | ** (2)                         |
| Yan S et al  |                                                  |                                 | *                                              |                                                                                    | *                                             |                                                |                                                   | ** (2)                         |

| Study                                                       | Selection                                        |                                 |                                                | Comparability                                                                      | Outcome                                       |                                                |                                                   | Total score (maximum: 8 stars) |
|-------------------------------------------------------------|--------------------------------------------------|---------------------------------|------------------------------------------------|------------------------------------------------------------------------------------|-----------------------------------------------|------------------------------------------------|---------------------------------------------------|--------------------------------|
|                                                             | Representativeness of sample (maximum: one star) | Sample size (maximum: one star) | Assessment of the exposure (maximum: one star) | Comparability of cohorts on the basis of the design or analysis (maximum: 2 stars) | Assessment of the outcome (maximum: one star) | Was follow up long enough? (maximum: one star) | Adequacy of follow up cohorts (maximum: one star) |                                |
| Wang L et al                                                |                                                  |                                 | *                                              |                                                                                    | *                                             |                                                |                                                   | ** (2)                         |
| Chen X et al                                                |                                                  |                                 | *                                              |                                                                                    | *                                             |                                                |                                                   | ** (2)                         |
| Liu S et al                                                 |                                                  |                                 | *                                              |                                                                                    | *                                             |                                                |                                                   | ** (2)                         |
| Fan L et al                                                 |                                                  |                                 | *                                              |                                                                                    | *                                             |                                                |                                                   | ** (2)                         |
| Yao et al                                                   |                                                  |                                 | *                                              |                                                                                    | *                                             |                                                |                                                   | ** (2)                         |
| Tian S et al                                                |                                                  |                                 | *                                              |                                                                                    | *                                             |                                                |                                                   | ** (2)                         |
| Lu H et al                                                  |                                                  |                                 | *                                              |                                                                                    | *                                             |                                                |                                                   | ** (2)                         |
| Fu H et al                                                  |                                                  |                                 | *                                              |                                                                                    | *                                             |                                                |                                                   | ** (2)                         |
| Fu H et al                                                  |                                                  |                                 | *                                              |                                                                                    | *                                             |                                                |                                                   | ** (2)                         |
| Chen D et al                                                |                                                  | *                               | *                                              |                                                                                    | *                                             |                                                |                                                   | *** (3)                        |
| Kuang et al                                                 |                                                  |                                 | *                                              |                                                                                    |                                               |                                                |                                                   | * (1)                          |
| Rubin et al                                                 |                                                  |                                 | *                                              |                                                                                    | *                                             |                                                |                                                   | ** (2)                         |
| COVID-19 National Emergency Response Center                 |                                                  |                                 | *                                              |                                                                                    | *                                             |                                                |                                                   | ** (2)                         |
| Pung et al                                                  |                                                  |                                 | *                                              |                                                                                    | *                                             |                                                |                                                   | ** (2)                         |
| Wolfel                                                      |                                                  |                                 | *                                              |                                                                                    | *                                             |                                                |                                                   | ** (2)                         |
| Dreher et al                                                |                                                  |                                 | *                                              |                                                                                    | *                                             |                                                |                                                   | ** (2)                         |
| Gritti et al                                                |                                                  |                                 | *                                              |                                                                                    | *                                             |                                                |                                                   | ** (2)                         |
| Spiteri et al                                               |                                                  | *                               | *                                              |                                                                                    | *                                             |                                                |                                                   | *** (3)                        |
| Covid-19 National Incident Room Surveillance Team Australia |                                                  |                                 | *                                              |                                                                                    |                                               |                                                |                                                   | * (1)                          |
| An P et. al.                                                |                                                  |                                 | *                                              |                                                                                    |                                               |                                                |                                                   | * (1)                          |
| Chan F-W et.al.                                             |                                                  |                                 | *                                              |                                                                                    | *                                             |                                                |                                                   | ** (2)                         |
| Chang D et. al.                                             |                                                  |                                 | *                                              |                                                                                    | *                                             |                                                |                                                   | ** (2)                         |

| Study                  | Selection                                        |                                 |                                                | Comparability                                                                      | Outcome                                       |                                                |                                                   | Total score (maximum: 8 stars) |
|------------------------|--------------------------------------------------|---------------------------------|------------------------------------------------|------------------------------------------------------------------------------------|-----------------------------------------------|------------------------------------------------|---------------------------------------------------|--------------------------------|
|                        | Representativeness of sample (maximum: one star) | Sample size (maximum: one star) | Assessment of the exposure (maximum: one star) | Comparability of cohorts on the basis of the design or analysis (maximum: 2 stars) | Assessment of the outcome (maximum: one star) | Was follow up long enough? (maximum: one star) | Adequacy of follow up cohorts (maximum: one star) |                                |
| Chen Q (b) et. al.     |                                                  |                                 | *                                              |                                                                                    |                                               |                                                |                                                   | * (1)                          |
| Cheung K et. al.       |                                                  |                                 | *                                              |                                                                                    | *                                             |                                                |                                                   | ** (2)                         |
| Fan H et. al.          |                                                  |                                 | *                                              |                                                                                    | *                                             |                                                |                                                   | ** (2)                         |
| FernandezRui z et. al. |                                                  |                                 | *                                              |                                                                                    |                                               |                                                |                                                   | * (1)                          |
| Guan W-j et. al.       |                                                  |                                 | *                                              |                                                                                    | *                                             |                                                |                                                   | ** (2)                         |
| Han C et. al.          |                                                  | *                               | *                                              |                                                                                    | *                                             |                                                |                                                   | *** (3)                        |
| Hsieh W-H et. al.      |                                                  |                                 | *                                              |                                                                                    | *                                             |                                                |                                                   | ** (2)                         |
| Huang R et. al.        |                                                  |                                 | *                                              |                                                                                    | *                                             |                                                |                                                   | ** (2)                         |
| Huang WH et. al.       |                                                  |                                 | *                                              |                                                                                    | *                                             |                                                |                                                   | ** (2)                         |
| Kim ES et. al.         |                                                  |                                 | *                                              |                                                                                    | *                                             |                                                |                                                   | ** (2)                         |
| Klopfenstein T et. al. |                                                  |                                 | *                                              |                                                                                    | *                                             |                                                |                                                   | ** (2)                         |
| Liu K et. al.          |                                                  |                                 | *                                              |                                                                                    | *                                             |                                                |                                                   | ** (2)                         |
| Lechien J et. al.      |                                                  |                                 | *                                              |                                                                                    | *                                             |                                                |                                                   | ** (2)                         |
| Liu Y et. al.          |                                                  |                                 | *                                              |                                                                                    | *                                             |                                                |                                                   | ** (2)                         |
| Pan F et. al.          |                                                  | *                               | *                                              |                                                                                    | *                                             |                                                |                                                   | *** (3)                        |
| Redd W et. al.         |                                                  | *                               | *                                              |                                                                                    | *                                             |                                                |                                                   | *** (3)                        |
| Ren L et. al.          |                                                  |                                 | *                                              |                                                                                    | *                                             |                                                |                                                   | ** (2)                         |
| Shi H et. al.          |                                                  |                                 | *                                              |                                                                                    | *                                             |                                                |                                                   | ** (2)                         |
| Song F et. al.         |                                                  |                                 | *                                              |                                                                                    |                                               |                                                |                                                   | * (1)                          |
| Wan Y et. al.          |                                                  |                                 | *                                              |                                                                                    | *                                             |                                                |                                                   | ** (2)                         |
| Wang L (b) et.         |                                                  |                                 | *                                              |                                                                                    | *                                             |                                                |                                                   | ** (2)                         |
| Wang L (c) et. al.     |                                                  |                                 | *                                              |                                                                                    | *                                             |                                                |                                                   | ** (2)                         |
| Wang X et. al.         |                                                  |                                 | *                                              |                                                                                    |                                               |                                                |                                                   | * (1)                          |
| Wang Z et. al.         |                                                  |                                 | *                                              |                                                                                    | *                                             |                                                |                                                   | ** (2)                         |
| Wei X-S et. al.        |                                                  |                                 | *                                              |                                                                                    | *                                             |                                                |                                                   | ** (2)                         |
| Wu J (a) et. al.       |                                                  | *                               | *                                              |                                                                                    | *                                             |                                                |                                                   | *** (3)                        |
| Wu J (b) et al         |                                                  |                                 | *                                              |                                                                                    | *                                             |                                                |                                                   | ** (2)                         |
| Wu Y et. al.           |                                                  |                                 | *                                              |                                                                                    |                                               |                                                |                                                   | * (1)                          |
| Xia X et. al.          |                                                  |                                 | *                                              |                                                                                    |                                               |                                                |                                                   | * (1)                          |
| Xiao F et. al.         |                                                  |                                 | *                                              |                                                                                    |                                               |                                                |                                                   | * (1)                          |

| Study               | Selection                                        |                                 |                                                | Comparability                                                                      | Outcome                                       |                                                |                                                   | Total score (maximum: 8 stars) |
|---------------------|--------------------------------------------------|---------------------------------|------------------------------------------------|------------------------------------------------------------------------------------|-----------------------------------------------|------------------------------------------------|---------------------------------------------------|--------------------------------|
|                     | Representativeness of sample (maximum: one star) | Sample size (maximum: one star) | Assessment of the exposure (maximum: one star) | Comparability of cohorts on the basis of the design or analysis (maximum: 2 stars) | Assessment of the outcome (maximum: one star) | Was follow up long enough? (maximum: one star) | Adequacy of follow up cohorts (maximum: one star) |                                |
| Xie H et. al.       |                                                  |                                 | *                                              |                                                                                    | *                                             |                                                |                                                   | ** (2)                         |
| Xiong Y et. al.     |                                                  |                                 | *                                              |                                                                                    | *                                             |                                                |                                                   | ** (2)                         |
| Xu X et al          |                                                  |                                 | *                                              |                                                                                    | *                                             |                                                |                                                   | ** (2)                         |
| Yu P et. al.        |                                                  |                                 | *                                              |                                                                                    |                                               |                                                |                                                   | * (1)                          |
| Zhang J (b) et. al. |                                                  |                                 | *                                              |                                                                                    |                                               |                                                |                                                   | * (1)                          |
| Zhao X-Y et. al.    |                                                  |                                 | *                                              |                                                                                    | *                                             |                                                |                                                   | ** (2)                         |
| Zhou S et. al.      |                                                  |                                 | *                                              |                                                                                    |                                               |                                                |                                                   | * (1)                          |
| Zou L et. al.       |                                                  |                                 | *                                              |                                                                                    | *                                             |                                                |                                                   | ** (2)                         |
| Sulaiman et al.     |                                                  |                                 | *                                              |                                                                                    | *                                             |                                                |                                                   | ** (2)                         |
| Elmunzer et al      |                                                  |                                 | *                                              |                                                                                    | *                                             |                                                |                                                   | ** (2)                         |
| Laszkowska et al    |                                                  |                                 | *                                              |                                                                                    | *                                             |                                                |                                                   | ** (2)                         |
| Hundt et al         |                                                  |                                 | *                                              |                                                                                    | *                                             |                                                |                                                   | ** (2)                         |
| Ferm et al          |                                                  |                                 | *                                              |                                                                                    | *                                             |                                                |                                                   | ** (2)                         |
| Zhan et al          |                                                  |                                 | *                                              |                                                                                    | *                                             |                                                |                                                   | ** (2)                         |
| Ramachandran et al  |                                                  |                                 | *                                              |                                                                                    | *                                             |                                                |                                                   | ** (2)                         |
| Suleyman et al      |                                                  |                                 | *                                              |                                                                                    | *                                             |                                                |                                                   | ** (2)                         |
| Docherty AB. et al. | *                                                |                                 | *                                              | *                                                                                  | *                                             |                                                | *                                                 | ***** (5)                      |
| Fanelli V. et al.   | *                                                |                                 |                                                | *                                                                                  | *                                             |                                                | *                                                 | ***** (4)                      |
| CDC USA             | *                                                |                                 | *                                              | *                                                                                  | *                                             |                                                | *                                                 | ***** (5)                      |
| CDC USA             | *                                                | *                               | *                                              | *                                                                                  | *                                             |                                                | *                                                 | ***** (6)                      |
| Borobia A. et al.   | *                                                | *                               | *                                              | **                                                                                 | *                                             |                                                | *                                                 | ***** (7)                      |
| Gil-Rodrigo et al   | *                                                |                                 |                                                | *                                                                                  | *                                             |                                                | *                                                 | ***** (4)                      |
| Khader et al        | *                                                | *                               | *                                              | *                                                                                  | *                                             |                                                | *                                                 | ***** (6)                      |
| Grande G et al      | *                                                | *                               | *                                              | *                                                                                  |                                               | *                                              | *                                                 | ***** (6)                      |
| Gulen et al         | *                                                |                                 | *                                              | *                                                                                  | *                                             |                                                | *                                                 | ***** (5)                      |
| Cholankeril et al   | *                                                |                                 |                                                | *                                                                                  | *                                             |                                                | *                                                 | ***** (4)                      |

| Study              | Selection                                        |                                 |                                                | Comparability                                                                      | Outcome                                       |                                                |                                                   | Total score (maximum: 8 stars) |
|--------------------|--------------------------------------------------|---------------------------------|------------------------------------------------|------------------------------------------------------------------------------------|-----------------------------------------------|------------------------------------------------|---------------------------------------------------|--------------------------------|
|                    | Representativeness of sample (maximum: one star) | Sample size (maximum: one star) | Assessment of the exposure (maximum: one star) | Comparability of cohorts on the basis of the design or analysis (maximum: 2 stars) | Assessment of the outcome (maximum: one star) | Was follow up long enough? (maximum: one star) | Adequacy of follow up cohorts (maximum: one star) |                                |
| Cavaliere K et al  | *                                                | *                               | *                                              | *                                                                                  | *                                             |                                                | *                                                 | ***** (6)                      |
| Hassani AH et al   | *                                                | *                               | *                                              | *                                                                                  | *                                             | *                                              | *                                                 | ***** (7)                      |
| Wu CY et al        | *                                                |                                 | *                                              | *                                                                                  | *                                             |                                                | *                                                 | ***** (5)                      |
| Wang K et al       | *                                                |                                 |                                                | *                                                                                  | *                                             |                                                | *                                                 | ***** (4)                      |
| Dietrich al        | *                                                | *                               |                                                | *                                                                                  |                                               | *                                              | *                                                 | ***** (5)                      |
| Kandasamy et al    | *                                                |                                 |                                                | *                                                                                  | *                                             |                                                | *                                                 | ***** (4)                      |
| Wagner J et al     | *                                                |                                 | *                                              | *                                                                                  | *                                             |                                                | *                                                 | ***** (5)                      |
| Wahab SF           | *                                                | *                               | *                                              | *                                                                                  |                                               | *                                              | *                                                 | ***** (6)                      |
| Cheung S et al     | c                                                |                                 |                                                | *                                                                                  | *                                             |                                                | *                                                 | ***** (4)                      |
| Livanos et al      | *                                                |                                 | *                                              | *                                                                                  | *                                             |                                                | *                                                 | ***** (5)                      |
| Bannaga et al      | *                                                |                                 |                                                | *                                                                                  | *                                             |                                                | *                                                 | ***** (4)                      |
| Moura et al        | *                                                | *                               |                                                | *                                                                                  |                                               | *                                              | *                                                 | ***** (5)                      |
| A. Papa et al      | *                                                | *                               |                                                | *                                                                                  | *                                             | *                                              | *                                                 | ***** (6)                      |
| N Aumpan et al.    | *                                                |                                 | *                                              | *                                                                                  | *                                             |                                                | *                                                 | ***** (5)                      |
| Ping Lei et al     | *                                                | *                               |                                                | *                                                                                  | *                                             | *                                              | *                                                 | ***** (6)                      |
| Mo P, et al.       | *                                                |                                 |                                                | *                                                                                  | *                                             |                                                | *                                                 | ***** (4)                      |
| Tsibouris et al    | *                                                | *                               |                                                | *                                                                                  | *                                             | *                                              | *                                                 | ***** (6)                      |
| Klopfenstein et al | *                                                |                                 |                                                | *                                                                                  | *                                             |                                                | *                                                 | ***** (4)                      |
| Aghemo et al       | *                                                | *                               |                                                | *                                                                                  |                                               | *                                              | *                                                 | ***** (5)                      |
| Colaneri et al     | *                                                |                                 |                                                | *                                                                                  | *                                             |                                                | *                                                 | ***** (4)                      |

**Table 5** Studies included in the Sensitivity Analysis

| Study             | Study type                 | Total No. of patients | Abdominal pain (n) | Diarrhea (n) | Nausea (n) | Vomiting (n) | Anorexia or loss of appetite (n) | Loss of taste (n) | Elevated liver enzymes (n) |
|-------------------|----------------------------|-----------------------|--------------------|--------------|------------|--------------|----------------------------------|-------------------|----------------------------|
| Zhang, J et al    | Retrospective cohort study | 140                   | 8                  | 18           | 24         | 7            | 17                               |                   | 8                          |
| Jin, X et al      | Retrospective cohort study | 651                   | 0                  | 56           | 13         | 14           | 0                                | 0                 | 64                         |
| Lin et al         | Retrospective cohort study | 95                    | 2                  | 23           | 17         | 4            | 17                               | 0                 | 31                         |
| Zhou et al        | Retrospective cohort study | 254                   | 3                  | 46           | 21         | 15           | 0                                | 0                 | 0                          |
| Pan et al         | Cross-sectional study      | 204                   | 2                  | 35           | 0          | 4            | 81                               | 0                 | 0                          |
| Cholankeril et al | Retrospective cohort study | 116                   | 10                 | 12           | 1          | 1            | 22                               | 0                 | 26                         |
| Saeed et al       | Retrospective cohort study | 9                     | 9                  | 1            | 8          | 5            | 0                                | 0                 | 0                          |
| Yang F et al      | Retrospective Cohort Study | 92                    | 0                  | 0            | 0          | 0            | 0                                | 0                 | 15                         |
| Chen, Y et al     | Retrospective Cohort Study | 42                    | 5                  | 7            | 4          | 3            | 0                                | 0                 | 0                          |
| Huang, C et al    | Prospective Cohort study   | 41                    | 0                  | 1            | 0          | 0            | 0                                | 0                 | 0                          |
| Chen, N et al     | Retrospective Cohort Study | 99                    | 0                  | 2            | 1          | 1            | 0                                | 0                 | 63                         |

| Study               | Study type                 | Total No. of patients | Abdominal pain (n) | Diarrhea (n) | Nausea (n) | Vomiting (n) | Anorexia or loss of appetite (n) | Loss of taste (n) | Elevated liver enzymes (n) |
|---------------------|----------------------------|-----------------------|--------------------|--------------|------------|--------------|----------------------------------|-------------------|----------------------------|
| Xu, X et al         | retrospective case series  | 62                    | 0                  | 3            | 0          | 0            | 0                                | 0                 | 0                          |
| Fan et al           | Retrospective Cohort Study | 148                   | 0                  | 6            | 6          | 0            | 0                                | 0                 | 75                         |
| Zhang, B et al      | Retrospective Cohort Study | 82                    | 0                  | 10           | 0          | 2            | 0                                | 0                 | 0                          |
| Huang Y et al       | Retrospective Cohort Study | 36                    | 0                  | 3            | 0          | 0            | 0                                | 0                 | 22                         |
| Wan, S et al        | Retrospective Cohort Study | 135                   | 0                  | 18           | 4          | 0            | 6                                | 0                 | 0                          |
| Zhang, Y et al      | Retrospective Cohort Study | 115                   | 0                  | 0            | 0          | 0            | 0                                | 0                 | 28                         |
| Arentz et al        | Retrospective Cohort Study | 21                    | 0                  | 0            | 0          | 0            | 0                                | 0                 | 8                          |
| Hajifathalian et al | Retrospective Cohort Study | 1059                  | 72                 | 234          | 168        | 91           | 240                              | 57                | 656                        |
| Kujawski et al      | Retrospective Cohort Study | 12                    | 1                  | 1            | 0          | 0            | 0                                | 0                 | 0                          |
| Pung et al          | Retrospective Cohort Study | 36                    | 0                  | 4            | 1          | 0            | 0                                | 0                 | 0                          |
| Tabata et al        | Retrospective Cohort Study | 104                   | 0                  | 18           | 0          | 0            | 0                                | 0                 | 9                          |

| Study               | Study type                 | Total No. of patients | Abdominal pain (n) | Diarrhea (n) | Nausea (n) | Vomiting (n) | Anorexia or loss of appetite (n) | Loss of taste (n) | Elevated liver enzymes (n) |
|---------------------|----------------------------|-----------------------|--------------------|--------------|------------|--------------|----------------------------------|-------------------|----------------------------|
| Docherty AB. et al. | Retrospective Cohort Study | 16,749                | 1146               | 2292         | 2178       | -            | -                                | -                 | -                          |
| Fanelli V. et al.   | Retrospective Cohort Study | 14,688                | -                  | 881          | -          | -            | 6                                | -                 | -                          |
| CDC USA             | Retrospective Cohort Study | 10,994                | 1329               | 3353         | 1746       | -            | -                                | -                 | -                          |
| CDC USA             | Retrospective Cohort Study | 6760                  | -                  | 1507         | 923        | -            | -                                | -                 | -                          |
| Borobia A. et al.   | Retrospective Cohort Study | 2226                  | -                  | 484          | 299        | -            | -                                | -                 | -                          |
| Gil-Rodrigo et al.  | Retrospective Cohort Study | 1000                  | 66                 | 186          | 75         | -            | -                                | -                 | -                          |
| Khader et al.       | Retrospective Cohort Study | 1                     | 1                  | -            | 1          | -            | -                                | -                 | -                          |
| Grande G et al.     | Retrospective Cohort Study | 1                     | -                  | -            | -          | 1            | -                                | -                 | -                          |
| Gulen et al.        | Retrospective Cohort Study | 1                     | 1                  | 1            | -          | -            | -                                | -                 | -                          |
| Cholankeril et al.  | Retrospective Cohort Study | 207                   | -                  | 22           | 22         | 22           | -                                | -                 | -                          |
| Cavaliere K et al.  | Retrospective Cohort Study | 6                     | -                  | -            | -          | 2            | -                                | -                 | -                          |



| Study            | Study type                 | Total No. of patients | Abdominal pain (n) | Diarrhea (n) | Nausea (n) | Vomiting (n) | Anorexia or loss of appetite (n) | Loss of taste (n) | Elevated liver enzymes (n) |
|------------------|----------------------------|-----------------------|--------------------|--------------|------------|--------------|----------------------------------|-------------------|----------------------------|
| Hassani AH et al | Retrospective Cohort Study | 2                     | 2                  | -            | -          | -            | -                                | -                 | -                          |
| Wu CY et al      | Retrospective Cohort Study | 1                     | 1                  | -            | 1          | -            | -                                | -                 | -                          |
| Wang K et al     | Retrospective Cohort Study | 2                     | 2                  | -            | -          | -            | -                                | -                 | -                          |
| Dietrich al      | Retrospective Cohort Study | 1                     | 1                  | -            | 1          | -            | -                                | -                 | -                          |
| Kandasamy et al  | Retrospective Cohort Study | 1                     | 1                  | -            | 1          | 1            | -                                | -                 | -                          |
| Wagner J et al   | Retrospective Cohort Study | 99                    |                    |              |            |              |                                  |                   |                            |
| Wahab SF         | Retrospective Cohort Study | 1                     | 1                  | 1            | -          | -            | -                                | -                 | -                          |
| Cheung S et al   | Retrospective Cohort Study | 1                     | 1                  | -            | 1          | 1            | -                                | -                 | -                          |
| Livanos et al    | Retrospective Cohort Study | 634                   | -                  | 245          | 157        | -            | -                                | -                 | -                          |
| Bannaga et al    | Retrospective Cohort Study | 321                   | 15                 | 13           | 15         | -            | -                                | -                 | -                          |
| Moura et al      | Retrospective Cohort Study | 400                   | 24                 | 69           | 55         | 30           | 46                               | -                 | -                          |

| Study              | Study type                 | Total No. of patients | Abdominal pain (n) | Diarrhea (n) | Nausea (n) | Vomiting (n) | Anorexia or loss of appetite (n) | Loss of taste (n) | Elevated liver enzymes (n) |
|--------------------|----------------------------|-----------------------|--------------------|--------------|------------|--------------|----------------------------------|-------------------|----------------------------|
| A. Papa et al      | Retrospective Cohort Study | 34                    | 1                  | 1            | 1          | -            | -                                | -                 | -                          |
| N Aumpan et al.    | Retrospective Cohort Study | 40                    | 2                  | 6            | 2          | 2            | 7                                | -                 | -                          |
| Ping Lei et al     | Retrospective Cohort Study | 115                   | -                  | 14           | 9          | 9            | 9                                | -                 | -                          |
| Mo P, et al.       | Retrospective Cohort Study | 155                   | -                  | 7            | 3          | 3            | -                                | -                 | 55                         |
| Tsibouris et al    | Retrospective Cohort Study | 61                    | 2                  | 11           | 2          | 2            | -                                | -                 | -                          |
| Klopfenstein et al | Retrospective Cohort Study | 114                   | 19                 | 55           | 25         | 9            | -                                | -                 | -                          |
| Aghemo et al       | Retrospective Cohort Study | 325                   | -                  | 69           | -          | 11           | -                                | -                 | 54                         |
| Colaneri et al     | Retrospective Cohort Study | 44                    | -                  | 3            | -          | -            | -                                | -                 | -                          |

**Table. 6** Number of deaths reported among patients infected with SARS-CoV2

| Study              | Total no. of patients | Number of deaths(n) |
|--------------------|-----------------------|---------------------|
| Siegel et al       | 3                     | 0                   |
| Pazgan-simon et al | 1                     | 0                   |
| Azwar et al        | 1                     | 0                   |
| Jin, X et al       | 651                   | 1                   |
| Nobel et al        | 278                   | 9                   |

| Study             | Total no. of patients | Number of deaths(n) |
|-------------------|-----------------------|---------------------|
| Lin et al         | 95                    | 0                   |
| Zhou et al        | 254                   | 16                  |
| Pan et al         | 204                   | 36                  |
| Cholankeril et al | 116                   | 1                   |
| Fu et al          | 1                     | 0                   |
| Li et al          | 1                     | 1                   |
| Saeed et al       | 9                     | 1                   |
| Arashiro et al.   | 1                     | 1                   |
| Yang F et al      | 92                    | 92                  |
| Chen Q et al      | 9                     | 0                   |
| Huang, C et al    | 41                    | 6                   |
| Chen, N et al     | 99                    | 11                  |
| Wang et al        | 138                   | 6                   |
| Xu, X et al       | 62                    | 0                   |
| Fan et al         | 148                   | 1                   |
| Zhang, B et al    | 82                    | 82                  |
| Huang Y et al     | 36                    | 36                  |
| Wan, S et al      | 135                   | 1                   |
| Zhang, Y et al    | 115                   | 1                   |
| Xu, Z et al       | 1                     | 1                   |
| Arentz et al      | 21                    | 11                  |
| Kujawski et al    | 12                    | 0                   |
| Young et al       | 18                    | 0                   |
| Sun et al         | 54                    | 2                   |
| Pung et al        | 36                    | 0                   |
| Qian et al        | 91                    | 0                   |
| Luo et al         | 183                   | 7                   |
| Zhou F et al      | 191                   | 54                  |
| Chen T et al      | 274                   | 113                 |
| Shi S et al       | 416                   | 30                  |
| Mao L et al       | 214                   | 1                   |
| Ai JW et al       | 102                   | 3                   |
| Liu Y et al       | 109                   | 31                  |
| Shu L et al       | 545                   | 0                   |
| Wei et al         | 100                   | 3                   |
| Zhao W et al      | 77                    | 5                   |
| Yang P et al      | 55                    | 2                   |
| Qi D et al        | 267                   | 4                   |
| Wen Y et al       | 417                   | 3                   |
| Xu Y et al        | 45                    | 1                   |

| Study                                                          | Total no. of patients | Number of deaths(n) |
|----------------------------------------------------------------|-----------------------|---------------------|
| Yan S et al                                                    | 168                   | 6                   |
| Wang L et al                                                   | 18                    | 0                   |
| Chen X et al                                                   | 291                   | 2                   |
| Liu S et al                                                    | 620                   | 0                   |
| Tian S et al                                                   | 37                    | 0                   |
| Lu H et al                                                     | 265                   | 1                   |
| Fu H et al                                                     | 52                    | 0                   |
| Pung et al                                                     | 17                    | 0                   |
| Dreher et al                                                   | 50                    | 7                   |
| Gritti et al                                                   | 21                    | 1                   |
| Spiteri et al                                                  | 38                    | 1                   |
| Covid-19 National Incident Room<br>Surveillance Team Australia | 295                   | 3                   |
| Sulaiman et al.                                                | 140                   | 12                  |
| Ferm et al                                                     | 892                   | 215                 |
| Ramachandran et al                                             | 150                   | 45                  |
| Suleyman et al                                                 | 463                   | 15                  |
| Borobia A. et al.                                              | 2226                  | 460                 |
| Massironi et al.                                               | 38                    | 5                   |
| Livanos AE. et al.                                             | 634                   | 47                  |
| Khader et al                                                   | 1                     | 0                   |
| Grande G et al                                                 | 1                     | 1                   |
| Gulen M et al                                                  | 1                     | 0                   |
| Cholankeril et al.                                             | 207                   | 4                   |
| Cavaliere et al                                                | 6                     | 0                   |
| Hassani AH et al.                                              | 2                     | 1                   |
| Wu CY et al                                                    | 1                     | 0                   |
| Wang K et al                                                   | 2                     | 1                   |
| Dietrich CG                                                    | 1                     | 0                   |
| Kandasamy S et al                                              | 1                     | 0                   |
| Wagner J et al                                                 | 99                    | 16                  |
| Wahab SF et al                                                 | 1                     | 0                   |
| Cheung S et al                                                 | 1                     | 0                   |
| Moura DTH et al                                                | 400                   | 89                  |
| A. Papa et al                                                  | 34                    | 9                   |
| N Aumpan et al.                                                | 40                    | 0                   |
| Tsibouris et al                                                | 61                    | 16                  |
| Docherty AB. et al.                                            | 16749                 | 5527                |
| Aghemo et al                                                   | 325                   | 56                  |
| <b>Total</b>                                                   | <b>30148</b>          | <b>7113</b>         |

**Table. 7** Number of deaths reported among patients infected with SARS-CoV2 who were experiencing GI symptoms/elevated liver enzymes

| Study              | Total no. of patients | Number of deaths in patients with GI symptoms |
|--------------------|-----------------------|-----------------------------------------------|
| Fan H et. al.      | 101                   | 9                                             |
| Han C et. al.      | 206                   | 0                                             |
| Hsih W-H et. al.   | 2                     | 0                                             |
| Huang WH et. al.   | 2                     | 0                                             |
| Kuang Y et. al.    | 944                   | 0                                             |
| Kim ES et. al.     | 28                    | 0                                             |
| Shu L et. al.      | 545                   | 0                                             |
| Jin X et. al.      | 651                   | 0                                             |
| Lin L et. al.      | 95                    | 0                                             |
| Pan F et. al.      | 21                    | 0                                             |
| Zhao D et. al.     | 19                    | 0                                             |
| Redd W et. al.     | 318                   | 16                                            |
| Luo S et. al.      | 1141                  | 7                                             |
| Song F et. al.     | 51                    | 0                                             |
| Wan Y et. al.      | 230                   | 4                                             |
| Wei X-S et. al.    | 84                    | 0                                             |
| Wu Y et. al.       | 74                    | 0                                             |
| Zhou F et. al.     | 191                   | 2                                             |
| Zhou Z et. al.     | 254                   | 5                                             |
| Xia X et. al.      | 10                    | 0                                             |
| Sulaiman et al.    | 140                   | 0                                             |
| Ramachandran et al | 150                   | 13                                            |
| Khader et al       | 1                     | 0                                             |
| Grande G et al     | 1                     | 1                                             |
| Gulen M et al      | 1                     | 0                                             |
| Cavaliere K et al  | 6                     | 0                                             |
| Hassani AH et al   | 2                     | 1                                             |
| Wu CY et al        | 1                     | 0                                             |
| Wang K et al       | 2                     | 1                                             |
| Dietrich et al     | 1                     | 0                                             |
| Kandasamy S et al  | 1                     | 0                                             |
| Wagner J et al     | 99                    | 16                                            |
| Wahab SF et al     | 1                     | 0                                             |
| Cheung S et al     | 1                     | 0                                             |

|                              |      |     |
|------------------------------|------|-----|
| <b>Moura DTH et al</b>       | 400  | 28  |
| <b>A. Papa et al</b>         | 8    | 1   |
| <b>Tabata et al</b>          | 104  | 0   |
| <b>Cholankeril G et. al.</b> | 116  | 0   |
| <b>Kujawski S et. al.</b>    | 12   | 0   |
| <b>Redd W et. al.</b>        | 318  | 16  |
| <b>Siegel et. al.</b>        | 3    | 0   |
| <b>Laszkowska et al</b>      | 1084 | 147 |
| <b>Total</b>                 | 7419 | 267 |

Supplementary figure.1 Forest plot depicting prevalence of diarrhea

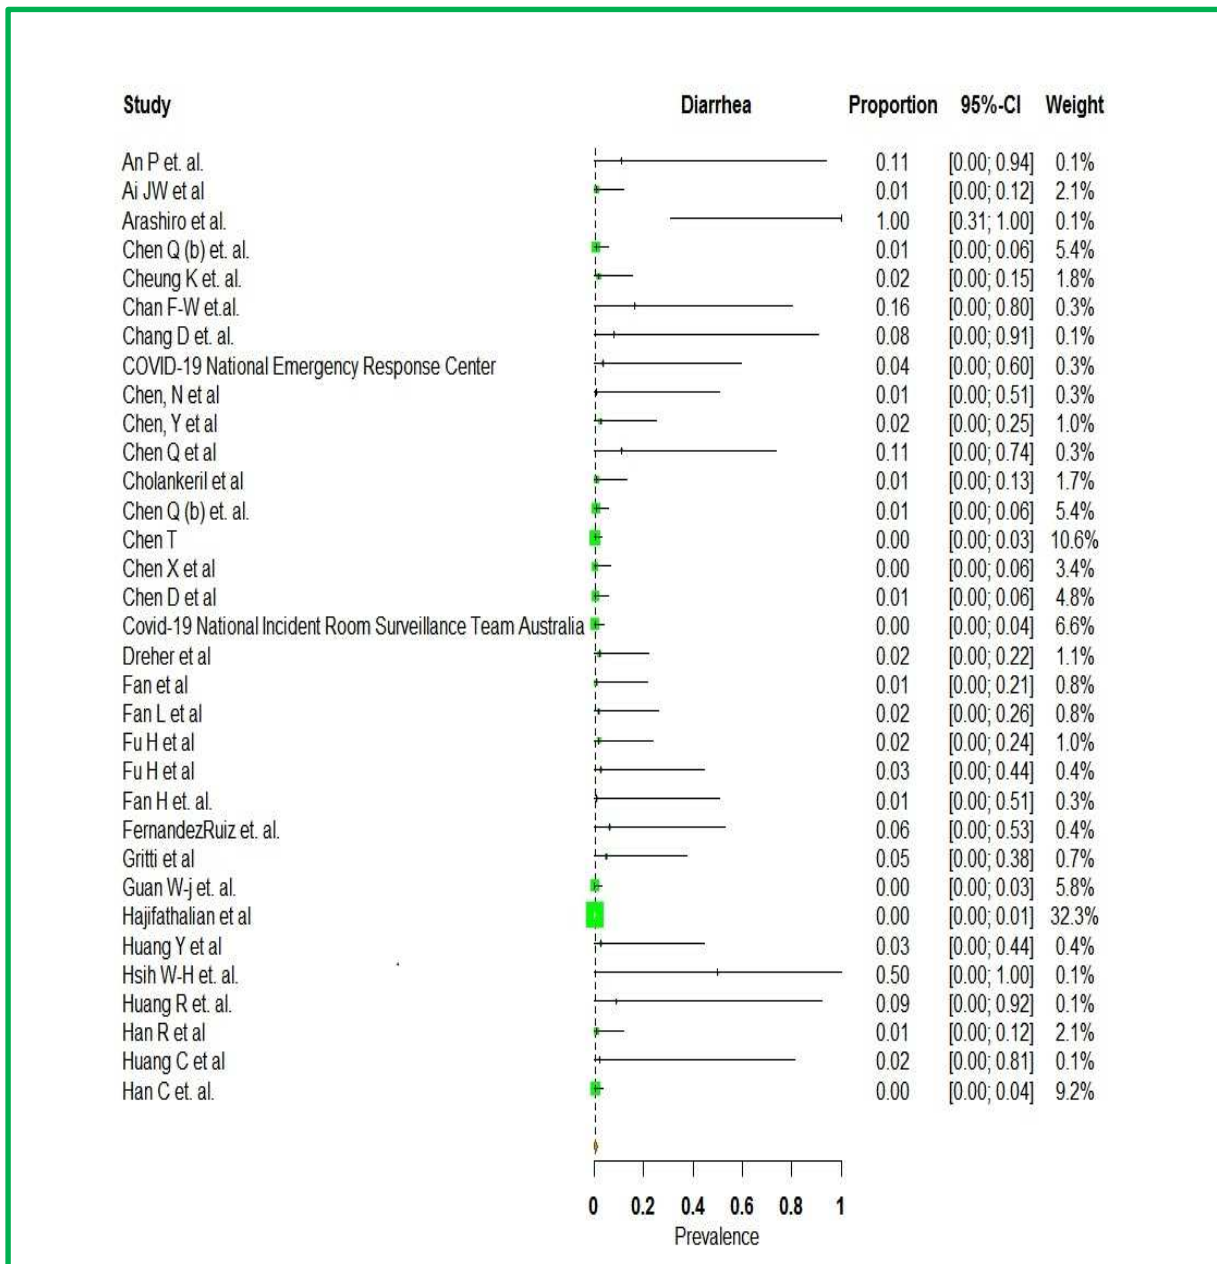

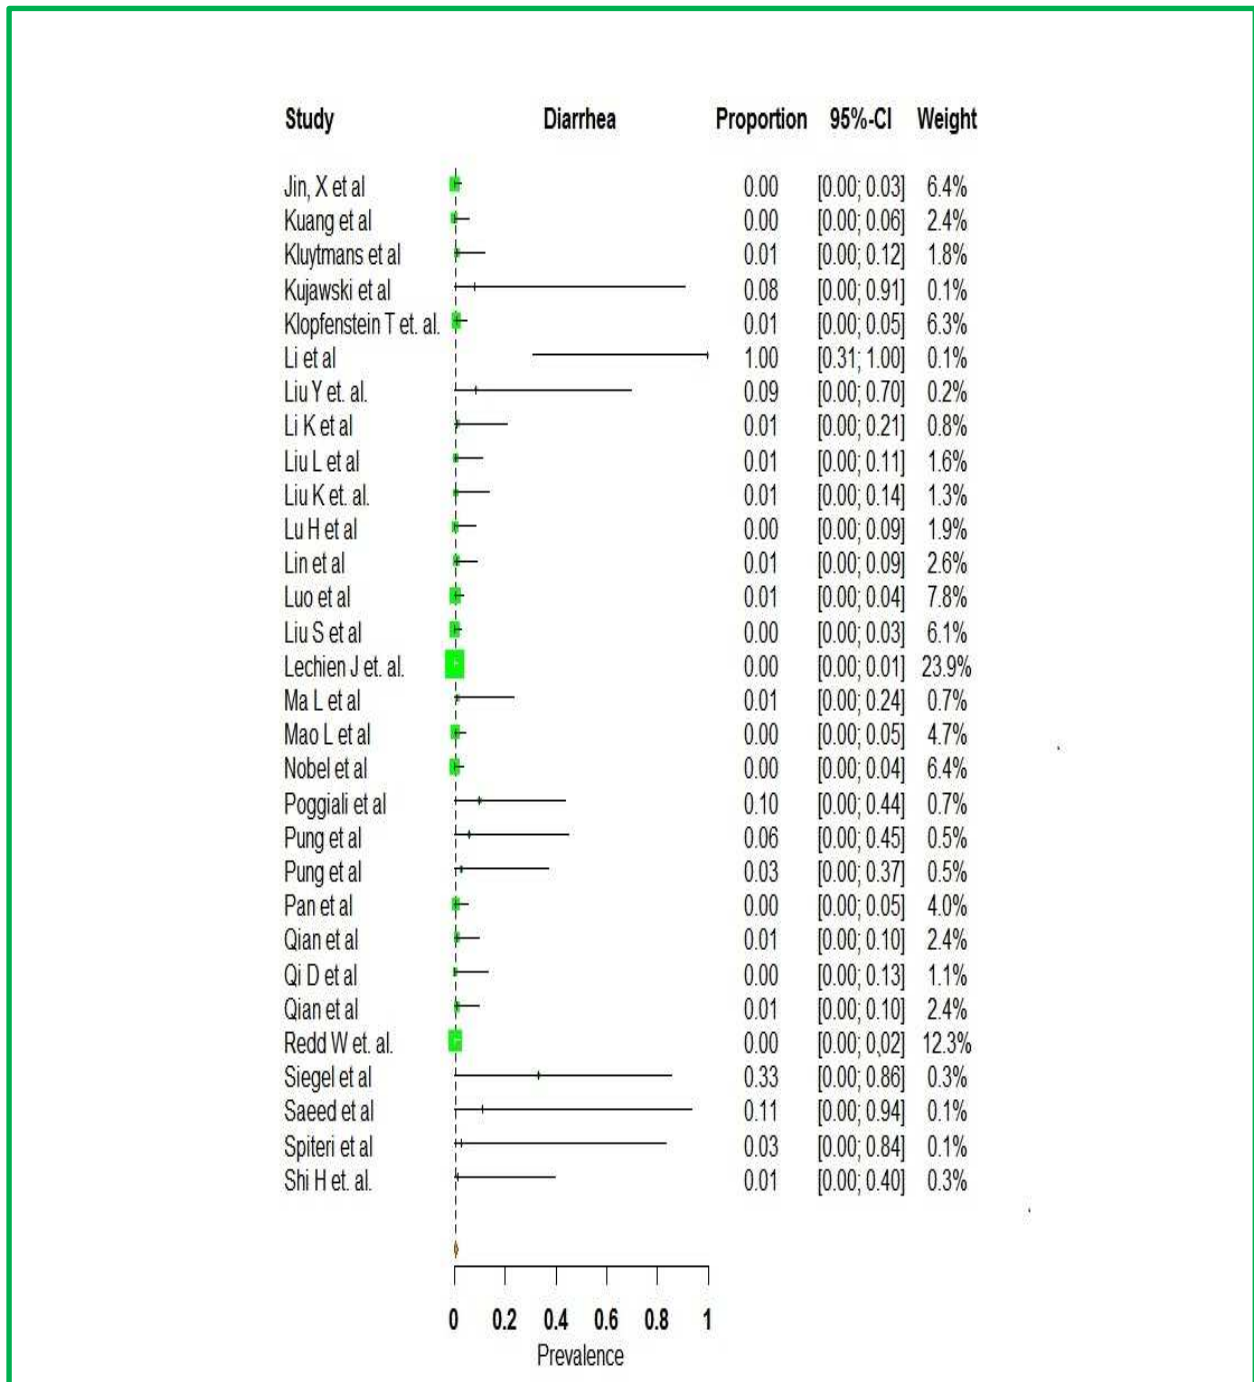



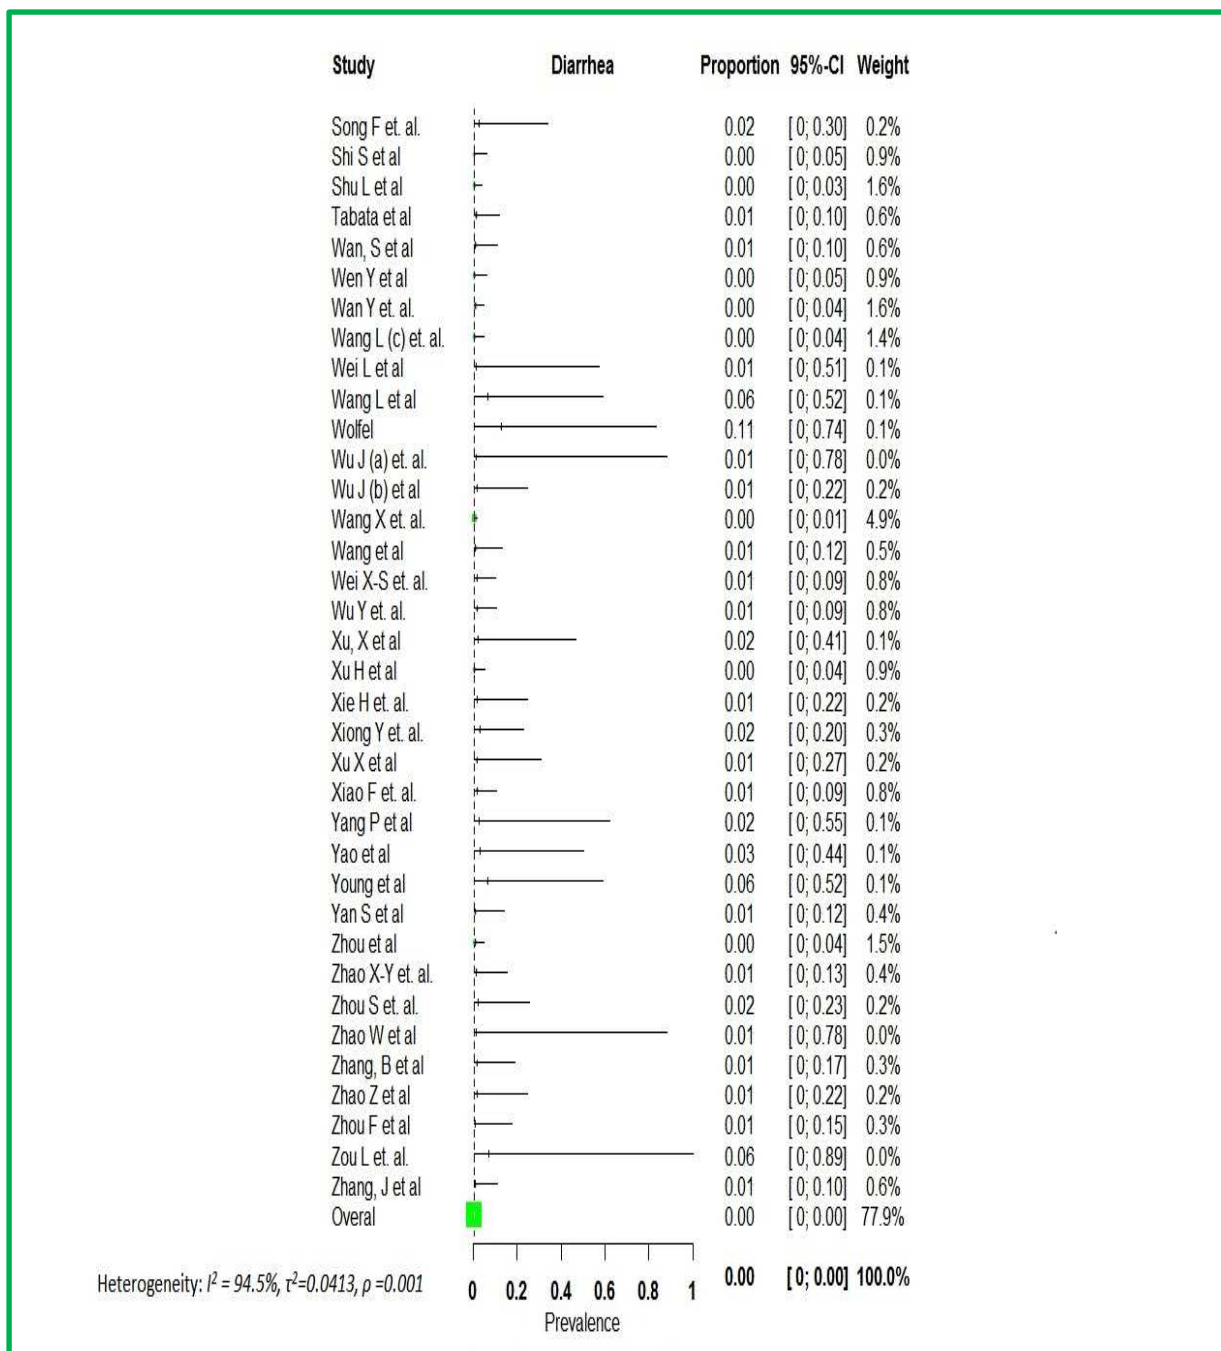

Supplementary figure.2 Mortality in patients experiencing GI symptoms/elevated liver enzymes

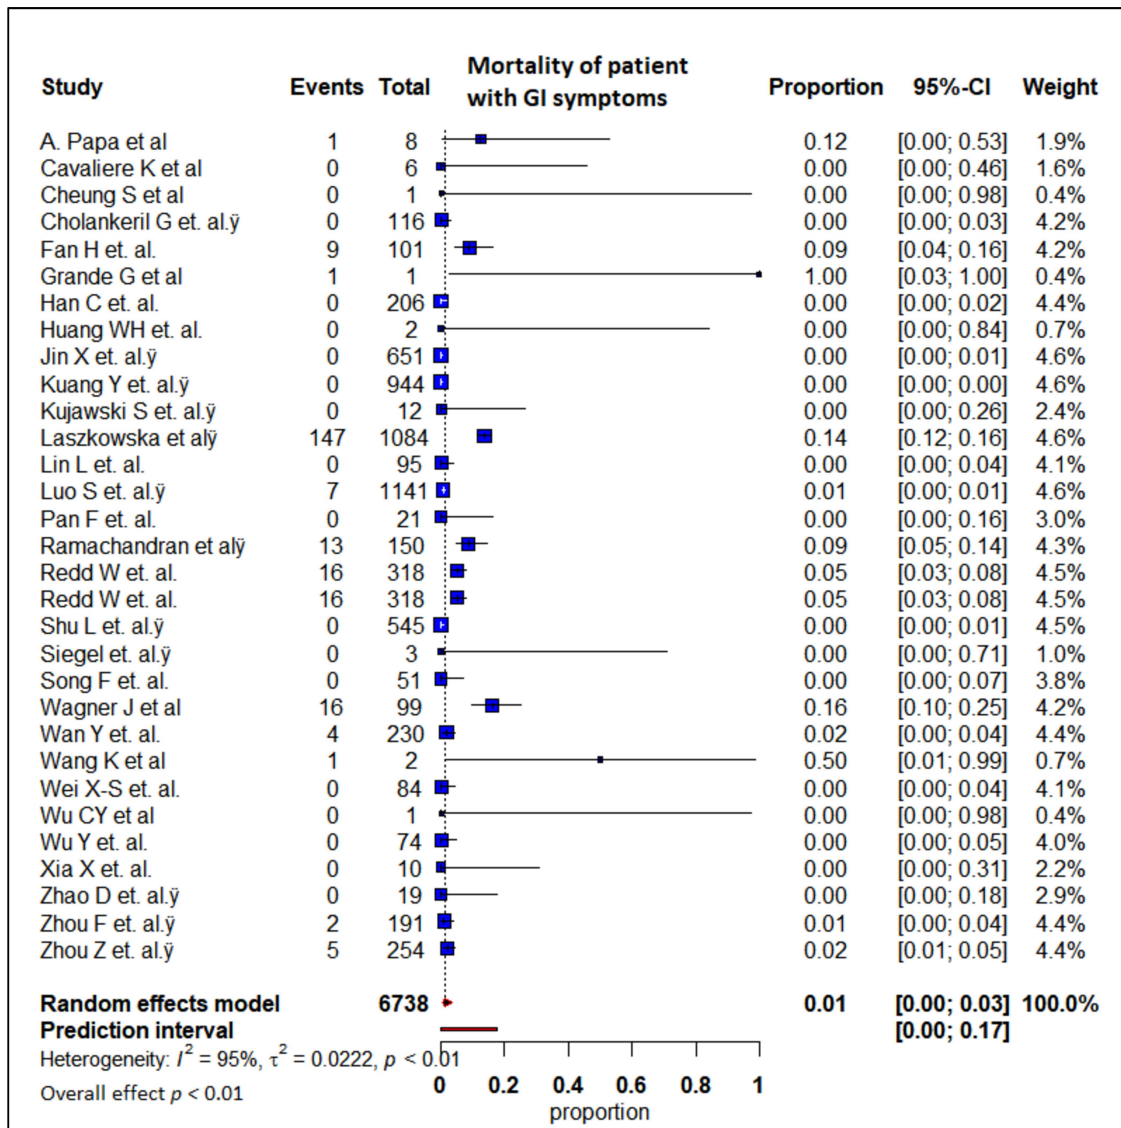

Supplement: bmjgast-2020-000571supp001.pdf [file bmjgast-2020-000571supp001.pdf]
